# Supplementary material
Source: PubMed Central journal article supplement (PMC4455808)
Supplement: rspb20150401supp1.pdf [file rspb20150401supp1.pdf]

## Thermal acclimation data table

| <u>genus</u>      | <u>species</u> | <u>group</u> | <u>Acclim.<br/>Time<br/>(d)</u> | <u>Cool<br/>Rate<br/>(C/min)</u> | <u>Heat<br/>rate<br/>(C/min)</u> | <u>latitude</u> | <u>longitude</u> | <u>habitat</u> | <u>Max<br/>CTmax<br/>(C)</u> | <u>Min<br/>CTmin<br/>(C)</u> | <u>CTmax<br/>ARR</u> | <u>CTmin<br/>ARR</u> | <u>seasonality<br/>(C)</u> | <u>ref</u> |
|-------------------|----------------|--------------|---------------------------------|----------------------------------|----------------------------------|-----------------|------------------|----------------|------------------------------|------------------------------|----------------------|----------------------|----------------------------|------------|
| Ascaphus          | truei          | amph         | 6                               | NA                               | 1                                | 46.877696       | -113.990799      | t              | 29.5                         | NA                           | 0.11                 | NA                   | 8.16                       | [1]        |
| Bufo              | fowleri        | amph         | 14                              | NA                               | 1                                | 40.789142       | -73.13496        | t              | 36.6                         | NA                           | 0.16                 | NA                   | 8.294                      | [2]        |
| Bufo              | marinus        | amph         | 14                              | NA                               | 1                                | 9.152102        | -79.84648        | t              | 41.8                         | NA                           | 0.21                 | NA                   | 0.684                      | [2]        |
| Bufo              | boreas         | amph         | 14                              | NA                               | 1                                | 33.862237       | -118.399519      | t              | 38.1                         | NA                           | 0.13                 | NA                   | 2.947                      | [2]        |
| Bufo              | boreas         | amph         | 14                              | NA                               | 1                                | 33.646966       | -117.689218      | t              | 37.8                         | NA                           | 0.11                 | NA                   | 3.597                      | [2]        |
| Bufo              | boreas         | amph         | 14                              | NA                               | 1                                | 51.091389       | -121.586667      | t              | 35.5                         | NA                           | 0.06                 | NA                   | 8.02                       | [2]        |
| Bufo              | exsul          | amph         | 14                              | NA                               | 1                                | 37.371667       | -117.985         | t              | 37.1                         | NA                           | 0.08                 | NA                   | 7.869                      | [2]        |
| Bufo              | nelsoni        | amph         | 14                              | NA                               | 1                                | 36.908557       | -116.759226      | t              | 36.2                         | NA                           | 0.04                 | NA                   | 8.56                       | [2]        |
| Bufo              | canorus        | amph         | 14                              | NA                               | 1                                | 37.911037       | -119.25793       | t              | 38                           | NA                           | 0.14                 | NA                   | 5.64                       | [2]        |
| Bufo              | haematiticus   | amph         | 14                              | NA                               | 1                                | 9.913056        | -83.682778       | t              | 37.5                         | NA                           | 0.10                 | NA                   | 0.642                      | [2]        |
| Bufo              | marmoreus      | amph         | 14                              | NA                               | 1                                | 16.183333       | -95.2            | t              | 40.2                         | NA                           | 0.09                 | NA                   | 1.269                      | [2]        |
| Bufo              | alvarius       | amph         | 14                              | NA                               | 1                                | 27.953366       | -110.86929       | t              | 39.9                         | NA                           | 0.18                 | NA                   | 4.941                      | [2]        |
| Bufo              | cognatus       | amph         | 14                              | NA                               | 1                                | 27.953366       | -110.86929       | t              | 41.3                         | NA                           | 0.18                 | NA                   | 4.941                      | [2]        |
| Bufo              | mazatlanensis  | amph         | 14                              | NA                               | 1                                | 21.567292       | -105.245325      | t              | 39.9                         | NA                           | 0.15                 | NA                   | 2.846                      | [2]        |
| Bufo              | debilis        | amph         | 14                              | NA                               | 1                                | 21.567292       | -105.245325      | t              | 40.1                         | NA                           | 0.15                 | NA                   | 2.846                      | [2]        |
| Bufo              | compactilis    | amph         | 14                              | NA                               | 1                                | 21.363487       | -101.929274      | t              | 36.9                         | NA                           | 0.12                 | NA                   | 2.76                       | [2]        |
| Eleutherodactylus | coqui          | amph         | 7                               | NA                               | 0.5                              | 18.402807       | -66.050137       | t              | 37.4                         | NA                           | 0.03                 | NA                   | 1.251                      | [3]        |
| Pseudacris        | regilla        | amph         | 14                              | NA                               | 1                                | 33.646966       | -117.689218      | t              | 36.6                         | NA                           | 0.19                 | NA                   | 3.597                      | [2]        |
| Hyla              | walkeri        | amph         | 14                              | NA                               | 1                                | 16.737142       | -92.637567       | t              | 38.1                         | NA                           | 0.12                 | NA                   | 1.187                      | [2]        |
| Hyla              | californiae    | amph         | 14                              | NA                               | 1                                | 34              | -117.396119      | t              | 36.8                         | NA                           | 0.32                 | NA                   | 4.875                      | [2]        |
| Smilisca          | baudinii       | amph         | 14                              | NA                               | 1                                | 24.771044       | -107.694788      | t              | 40.4                         | NA                           | 0.29                 | NA                   | 3.949                      | [2]        |
| Pternohyla        | fodiens        | amph         | 14                              | NA                               | 1                                | 21.567292       | -105.245325      | t              | 39.5                         | NA                           | 0.16                 | NA                   | 2.846                      | [2]        |

|            |              |      |    |    |     |            |            |   |      |    |      |    |        |     |
|------------|--------------|------|----|----|-----|------------|------------|---|------|----|------|----|--------|-----|
| Litoria    | aurea        | amph | 10 | NA | 1   | -38.916664 | 146.333333 | t | 36.2 | NA | 0.09 | NA | 2.964  | [4] |
| Litoria    | rubella      | amph | 10 | NA | 1   | -20.012274 | 148.246291 | t | 39.5 | NA | 0.18 | NA | 3.015  | [4] |
| Litoria    | rubella      | amph | 10 | NA | 1   | -17.093286 | 145.923522 | t | 38.7 | NA | 0.15 | NA | 2.477  | [4] |
| Litoria    | rubella      | amph | 10 | NA | 1   | -19.257622 | 146.817879 | t | 39.3 | NA | 0.18 | NA | 3.094  | [4] |
| Litoria    | peroni       | amph | 10 | NA | 1   | -33.456091 | 151.348206 | t | 36.3 | NA | 0.26 | NA | 3.79   | [4] |
| Litoria    | peroni       | amph | 10 | NA | 1   | -30.514342 | 151.666964 | t | 36.2 | NA | 0.16 | NA | 4.742  | [4] |
| Litoria    | rothii       | amph | 10 | NA | 1   | -20.012274 | 148.246291 | t | 38.9 | NA | 0.14 | NA | 3.015  | [4] |
| Litoria    | rothii       | amph | 10 | NA | 1   | -17.093286 | 145.923522 | t | 39.4 | NA | 0.38 | NA | 2.477  | [4] |
| Litoria    | lesueri      | amph | 10 | NA | 1   | -16.920334 | 145.77086  | t | 34.2 | NA | 0.08 | NA | 2.404  | [4] |
| Litoria    | lesueri      | amph | 10 | NA | 1   | -37.496175 | 148.17353  | t | 34.5 | NA | 0.20 | NA | 3.755  | [4] |
| Litoria    | lesueri      | amph | 10 | NA | 1   | -37.496546 | 148.235908 | t | 33.1 | NA | 0.14 | NA | 3.766  | [4] |
| Litoria    | ewingi       | amph | 10 | NA | 1   | -30.514342 | 151.666964 | t | 32.8 | NA | 0.11 | NA | 4.742  | [4] |
| Litoria    | ewingi       | amph | 10 | NA | 1   | -37.359262 | 142.59155  | t | 32.6 | NA | 0.09 | NA | 4.047  | [4] |
| Litoria    | ewingi       | amph | 10 | NA | 1   | -37.87133  | 145.24246  | t | 34   | NA | 0.14 | NA | 3.753  | [4] |
| Litoria    | alpina       | amph | 10 | NA | 1   | -36.455917 | 148.263588 | t | 32.9 | NA | 0.17 | NA | 4.833  | [4] |
| Litoria    | alpina       | amph | 10 | NA | 1   | -37.833306 | 146.266671 | t | 32.2 | NA | 0.16 | NA | 4.18   | [4] |
| Litoria    | bicolor      | amph | 10 | NA | 1   | -17.093286 | 145.923522 | t | 41.4 | NA | 0.29 | NA | 2.477  | [4] |
| Litoria    | fallax       | amph | 10 | NA | 1   | -17.093286 | 145.923522 | t | 41.6 | NA | 0.21 | NA | 2.477  | [4] |
| Litoria    | fallax       | amph | 10 | NA | 1   | -19.257622 | 146.817879 | t | 39.6 | NA | 0.03 | NA | 3.094  | [4] |
| Litoria    | fallax       | amph | 10 | NA | 1   | -33.456091 | 151.348206 | t | 37.5 | NA | 0.15 | NA | 3.79   | [4] |
| Litoria    | caerulea     | amph | 10 | NA | 1   | -19.257622 | 146.817879 | t | 39.2 | NA | 0.19 | NA | 3.094  | [4] |
| Litoria    | chloris      | amph | 10 | NA | 1   | -17.266821 | 145.476035 | t | 38.3 | NA | 0.07 | NA | 2.704  | [4] |
| Litoria    | gracilentata | amph | 10 | NA | 1   | -17.266821 | 145.476035 | t | 38.3 | NA | 0.09 | NA | 2.704  | [4] |
| Acris      | crepitans    | amph | 5  | NA | 0.6 | 42.779442  | -96.92921  | t | 43.2 | NA | 0.08 | NA | 11.144 | [5] |
| Pseudacris | triseriata   | amph | 5  | NA | 0.6 | 42.779442  | -96.92921  | t | 40.4 | NA | 0.07 | NA | 11.144 | [5] |
| Cophixalus | ornatus      | amph | 10 | NA | 1   | -17.806672 | 146.007098 | t | 33.3 | NA | 0.11 | NA | 2.719  | [4] |
| Crinia     | signifera    | amph | 10 | NA | 1   | -30.514342 | 151.666964 | t | 35.3 | NA | 0.15 | NA | 4.742  | [4] |
| Crinia     | signifera    | amph | 10 | NA | 1   | -36.455917 | 148.263588 | t | 34.9 | NA | 0.13 | NA | 4.833  | [4] |

|                  |               |      |    |    |      |            |             |    |      |    |      |    |       |     |
|------------------|---------------|------|----|----|------|------------|-------------|----|------|----|------|----|-------|-----|
| Crinia           | signifera     | amph | 10 | NA | 1    | -37.496175 | 148.17353   | t  | 35.5 | NA | 0.16 | NA | 3.755 | [4] |
| Crinia           | signifera     | amph | 10 | NA | 1    | -37.87133  | 145.24246   | t  | 33.5 | NA | 0.03 | NA | 3.753 | [4] |
| Crinia           | signifera     | amph | 10 | NA | 1    | -37.359262 | 142.59155   | t  | 35.7 | NA | 0.21 | NA | 4.047 | [4] |
| Crinia           | signifera     | amph | 10 | NA | 1    | -42.300245 | 147.370999  | t  | 33.5 | NA | 0.14 | NA | 3.418 | [4] |
| Crinia           | laevis        | amph | 10 | NA | 1    | -37.359262 | 142.59155   | t  | 34.6 | NA | 0.23 | NA | 4.047 | [4] |
| Crinia           | victoriana    | amph | 10 | NA | 1    | -36.758711 | 144.283746  | t  | 35   | NA | 0.13 | NA | 4.844 | [4] |
| Pseudophryne     | corroboree    | amph | 10 | NA | 1    | -36.391785 | 148.427442  | t  | 35.2 | NA | 0.16 | NA | 4.722 | [4] |
| Pseudophryne     | bibronii      | amph | 10 | NA | 1    | -33.456091 | 151.348206  | t  | 36.2 | NA | 0.29 | NA | 3.79  | [4] |
| Pseudophryne     | bibronii      | amph | 10 | NA | 1    | -36.691685 | 145.886735  | t  | 35   | NA | 0.17 | NA | 5.037 | [4] |
| Philoria         | frosti        | amph | 10 | NA | 1    | -37.833306 | 146.266671  | t  | 28.8 | NA | 0.08 | NA | 4.18  | [4] |
| Limnodynastes    | peronii       | amph | 10 | NA | 1    | -17.093286 | 145.923522  | t  | 34.1 | NA | 0.18 | NA | 2.477 | [4] |
| Limnodynastes    | dorsalis      | amph | 10 | NA | 1    | -31.090742 | 150.930838  | t  | 36.5 | NA | 0.22 | NA | 5.187 | [4] |
| Limnodynastes    | dorsalis      | amph | 10 | NA | 1    | -38.916664 | 146.333333  | t  | 35   | NA | 0.09 | NA | 2.964 | [4] |
| Limnodynastes    | tasmaniensis  | amph | 10 | NA | 1    | -30.514342 | 151.666964  | t  | 33.4 | NA | 0.18 | NA | 4.742 | [4] |
| Chiropterotriton | multidentatus | amph | 12 | NA | NA   | 20.194491  | -98.722227  | t  | 34   | NA | 0.16 | NA | 1.571 | [6] |
| Rana             | vergatipes    | amph | 6  | NA | 0.54 | 39.86      | -74.69      | t  | 38   | NA | 0.11 | NA | 8.405 | [7] |
| Rana             | pipiens       | amph | 14 | NA | 1    | 10.015501  | -83.788401  | t  | 35.7 | NA | 0.19 | NA | 0.585 | [2] |
| Rana             | palmipes      | amph | 14 | NA | 1    | 9.913056   | -83.682778  | t  | 36.9 | NA | 0.17 | NA | 0.642 | [2] |
| Rana             | cascadae      | amph | 14 | NA | 1    | 39.992683  | -120.803947 | t  | 33.6 | NA | 0.12 | NA | 6.414 | [2] |
| Rana             | pretiosa      | amph | 14 | NA | 1    | 51.091389  | -121.586667 | t  | 34.8 | NA | 0.12 | NA | 8.02  | [2] |
| Rana             | sylvatica     | amph | 14 | NA | 1    | 51.091389  | -121.586667 | t  | 33.6 | NA | 0.13 | NA | 8.02  | [2] |
| Rana             | clamitans     | amph | 14 | NA | 1    | 40.789142  | -73.13496   | t  | 35   | NA | 0.31 | NA | 8.294 | [2] |
| Rana             | catesbeiana   | amph | 14 | NA | 1    | 40.789142  | -73.13496   | t  | 33.6 | NA | 0.11 | NA | 8.294 | [2] |
| Rana             | palustris     | amph | 14 | NA | 1    | 40.789142  | -73.13496   | t  | 31.3 | NA | 0.09 | NA | 8.294 | [2] |
| Buergeria        | japonica      | amph | 7  | NA | 0.31 | 24.552778  | 121.500278  | fw | 44.7 | NA | 0.01 | NA | 3.919 | [8] |
| Buergeria        | japonica      | amph | 7  | NA | 0.31 | 23.455556  | 120.605     | fw | 43.9 | NA | 0.15 | NA | 3.499 | [8] |
| Scaphiopus       | hammondii     | amph | 14 | NA | 1    | 33.646966  | -117.689218 | t  | 40.3 | NA | 0.19 | NA | 3.597 | [2] |
| Scaphiopus       | holbrooki     | amph | 14 | NA | 1    | 40.789142  | -73.13496   | t  | 34   | NA | 0.33 | NA | 8.294 | [2] |

|                 |                 |       |     |      |      |           |            |    |      |      |      |      |             |          |
|-----------------|-----------------|-------|-----|------|------|-----------|------------|----|------|------|------|------|-------------|----------|
| Ambystoma       | jeffersoni      | amph  | 10  | NA   | 0.6  | 39.424142 | -84.185712 | t  | 36.1 | NA   | 0.08 | NA   | 9.088       | [9]      |
| Ambystoma       | opacum          | amph  | 30  | NA   | 0.55 | 35.994033 | -78.898619 | t  | 38.5 | NA   | 0.10 | NA   | 7.634       | [10]     |
| Cryptobranchus  | alleganiensis   | amph  | 14  | NA   | NA   | 36.672006 | -92.381362 | fw | 36.6 | NA   | 0.20 | NA   | 8.615       | [11]     |
| Necturus        | maculosus       | amph  | 14  | NA   | 1    | 45.638378 | -89.413769 | fw | 35.7 | NA   | 0.17 | NA   | 11          | [12]     |
| Desmognathus    | fuscus          | amph  | 7   | 0.75 | 0.75 | 39.777825 | -84.689749 | t  | 34.9 | -2.3 | 0.08 | 0.19 | 9.225       | [13]     |
| Eurycea         | bislineata      | amph  | 7   | 0.75 | 0.75 | 39.777825 | -84.689749 | t  | 35.5 | -2   | 0.11 | 0.23 | 9.225       | [14]     |
| Desmognathus    | quadramaculatus | amph  | 5   | 0.65 | NA   | 35.0964   | -83.719914 | t  | NA   | -2.5 | NA   | 0.31 | 6.997       | [15]     |
| Desmognathus    | monticola       | amph  | 5   | 0.65 | NA   | 35.0964   | -83.719914 | t  | NA   | -1.4 | NA   | 0.27 | 6.997       | [15]     |
| Desmognathus    | ochrophaeus     | amph  | 5   | 0.65 | NA   | 35.0964   | -83.719914 | t  | NA   | -1.8 | NA   | 0.28 | 6.997       | [15]     |
| Plethodon       | jordani         | amph  | 5   | 0.65 | NA   | 35.0964   | -83.719914 | t  | NA   | -2   | NA   | 0.19 | 6.997       | [15]     |
| Triturus        | dobrogicus      | amph  | 70  | NA   | 0.5  | 46.891402 | 19.443249  | fw | 37.9 | NA   | 0.11 | NA   | 7.771       | [16]     |
| Notophthalmus   | viridescens     | amph  | 30  | NA   | 0.55 | 36.494084 | -81.119608 | t  | 42.7 | NA   | 0.21 | NA   | 7.314       | [10]     |
| Bufo            | boreas          | amph  | 14  | NA   | 1    | 35        | NA         | t  | 36.5 | NA   | 0.10 | NA   | NA          | [2]      |
| Pseudacris      | regilla         | amph  | 14  | NA   | 1    | 35        | NA         | t  | 37.7 | NA   | 0.20 | NA   | NA          | [2]      |
| Leptodactylus   | melanotus       | amph  | 14  | NA   | 1    | 30        | NA         | t  | 39.8 | NA   | 0.56 | NA   | NA          | [2]      |
| Rana            | pipiens         | amph  | 14  | NA   | 1    | 45        | NA         | t  | 35.4 | NA   | 0.16 | NA   | NA          | [2]      |
| Rana            | pipiens         | amph  | 14  | NA   | 1    | 17        | NA         | t  | 35.2 | NA   | 0.21 | NA   | NA          | [2]      |
| Rana            | pipiens         | amph  | 14  | NA   | 1    | 17        | NA         | t  | 37   | NA   | 0.33 | NA   | NA          | [2]      |
| Rana            | boylei          | amph  | 14  | NA   | 1    | 42        | NA         | t  | 34   | NA   | 0.12 | NA   | NA          | [2]      |
| Scaphiopus      | hammondii       | amph  | 14  | NA   | 1    | 31        | NA         | t  | 40   | NA   | 0.27 | NA   | NA          | [2]      |
| Cancer          | pagurus         | crust | 21  | NA   | 0.2  | 54.691745 | -1.163     | sw | 30.6 | NA   | 0.49 | NA   | 3.277097022 | [17]     |
| Crangon         | crangon         | crust | 14  | 0.2  | 0.75 | 50.336971 | -4.150181  | sw | 35.4 | -1.1 | 0.20 | 0.28 | 2.723084514 | [18, 19] |
| Palaemonetes    | varians         | crust | 120 | NA   | 0.93 | 48.657117 | -1.624435  | sw | 35.9 | NA   | 0.50 | NA   | 3.15386667  | [20]     |
| Palaemon        | elegans         | crust | 7   | NA   | 0.75 | 50.356989 | -4.126444  | sw | 35   | NA   | 0.30 | NA   | 2.723084514 | [18]     |
| Palaemon        | serratus        | crust | 7   | NA   | 0.75 | 50.352533 | -4.132247  | sw | 33.5 | NA   | 0.31 | NA   | 2.723084514 | [18]     |
| Palaemon        | varians         | crust | 7   | NA   | 0.75 | 50.724786 | -1.517822  | sw | 36   | NA   | 0.23 | NA   | 3.172358568 | [18]     |
| Palaemon        | montagui        | crust | 7   | NA   | 0.75 | 51.492167 | 0.848306   | sw | 27.6 | NA   | 0.26 | NA   | 3.572310562 | [18]     |
| Farfantepenaeus | aztecus         | crust | 21  | NA   | 1    | 21.614092 | -97.546388 | sw | 42   | NA   | 0.50 | NA   | 2.594699803 | [21]     |

|               |                |       |    |      |      |            |             |    |      |      |      |      |             |      |
|---------------|----------------|-------|----|------|------|------------|-------------|----|------|------|------|------|-------------|------|
| Carcinus      | maenas         | crust | 21 | NA   | 0.2  | 54.691745  | -1.163      | sw | 35.8 | NA   | 0.16 | NA   | 3.277097022 | [17] |
| Hemigrapsus   | nudus          | crust | 14 | 0.5  | 0.5  | 48.898884  | -125.23     | sw | 33.6 | 3.5  | 0.42 | 0.22 | 2.505196373 | [22] |
| Saduria       | entomon        | crust | 14 | NA   | 0.2  | 60.37347   | 22.0473     | sw | 27.5 | NA   | 0.11 | NA   | 5.756155786 | [23] |
| Paramelita    | nigroculus     | crust | 12 | NA   | 1.4  | -33.966667 | 18.416667   | fw | 35.3 | NA   | 0.17 | NA   | 2.851       | [24] |
| Orchestia     | gammarellus    | crust | 10 | NA   | 1    | 65.923611  | -22.431389  | t  | 38.6 | NA   | 0.14 | NA   | 4.285       | [25] |
| Orchestia     | gammarellus    | crust | 10 | NA   | 1    | 65.821111  | -22.488611  | t  | 37.9 | NA   | 0.15 | NA   | 4.294       | [25] |
| Orchestia     | gammarellus    | crust | 10 | NA   | 1    | 63.797778  | -22.72      | t  | 37.7 | NA   | 0.17 | NA   | 3.774       | [25] |
| Orchestia     | gammarellus    | crust | 10 | NA   | 1    | 64.019722  | -22.155278  | t  | 37.9 | NA   | 0.19 | NA   | 3.986       | [25] |
| Oronectes     | rusticus       | crust | 6  | NA   | 0.6  | 39.440463  | -84.522219  | fw | 41.3 | NA   | 0.24 | NA   | 9.083       | [26] |
| Oronectes     | virilis        | crust | 6  | NA   | 0.6  | 39.440463  | -84.522219  | fw | 39.2 | NA   | 0.18 | NA   | 9.083       | [26] |
| Macrobrachium | tenellum       | crust | 21 | NA   | 1    | 26.900053  | -112        | fw | 43   | NA   | 0.58 | NA   | 5.293       | [27] |
| Macrobrachium | acanthurus     | crust | 30 | 1    | 1    | 18.366672  | -92.866669  | fw | 39.8 | 11   | 0.48 | 0.44 | 1.894       | [28] |
| Macrobrachium | malcolmsonii   | crust | 30 | NA   | 0.3  | 11.483078  | 79.77293    | fw | 41.4 | NA   | 0.37 | NA   | 2.506       | [29] |
| Asellus       | aquaticus      | crust | 15 | NA   | 0.2  | 60.451813  | 22.26663    | fw | 34.9 | NA   | 0.58 | NA   | 7.957       | [30] |
| Homarus       | americanus     | crust | 21 | NA   | 0.75 | 41.9       | NA          | sw | 30   | NA   | 0.31 | NA   | NA          | [31] |
| Macrobrachium | rosenbergii    | crust | 28 | 1    | 1    | 3.96       | NA          | sw | 42   | 10.5 | 0.47 | 0.50 | NA          | [32] |
| Palaemon      | macrodactylus  | crust | 7  | NA   | 0.75 | 28.16      | NA          | sw | 37.8 | NA   | 0.39 | NA   | NA          | [18] |
| Litopenaeus   | vannamei       | crust | 30 | 0.02 | 0.02 | 12.17      | NA          | sw | 42.2 | 7.5  | 0.41 | 0.24 | NA          | [33] |
| Penaeus       | merguiensis    | crust | 21 | 0.02 | NA   | NA         | NA          | sw | NA   | 5.3  | NA   | 0.42 | NA          | [34] |
| Penaeus       | semisulcatus   | crust | 30 | NA   | NA   | NA         | NA          | sw | NA   | 6.4  | NA   | 0.27 | NA          | [35] |
| Portunus      | pelagicus      | crust | 21 | 0.2  | 0.2  | 22.12      | NA          | sw | 42.3 | 11.6 | 0.22 | 0.37 | NA          | [36] |
| Fundulus      | heteroclitus   | fish  | 21 | 0.3  | 0.3  | 42.923704  | -70.8       | sw | 41.8 | -1.1 | 0.41 | 0.29 | 5.506663297 | [37] |
| Fundulus      | heteroclitus   | fish  | 21 | 0.3  | 0.3  | 31.149953  | -81.3       | sw | 42.5 | -1.1 | 0.36 | 0.35 | 3.923082995 | [37] |
| Liza          | viagiensis     | fish  | 14 | 0.31 | 0.31 | -5.464722  | 123.789     | sw | 44.5 | 9.9  | 0.30 | 0.42 | 1.006628034 | [38] |
| Apogon        | novemfasciatus | fish  | 14 | 0.31 | 0.31 | -5.464722  | 123.789     | sw | 40.1 | 12.9 | 0.39 | 0.40 | 1.006628034 | [38] |
| Gibbonsia     | elegans        | fish  | 7  | 0.05 | 0.07 | 34.448598  | -120.471551 | sw | 31.6 | 3    | 0.14 | 0.24 | 1.703308112 | [39] |
| Gibbonsia     | montereyensis  | fish  | 7  | 0.05 | 0.07 | 35.643859  | -121.190753 | sw | 29.3 | 2.1  | 0.22 | 0.17 | 1.631129057 | [39] |
| Bathygobius   | fuscus         | fish  | 14 | 0.31 | 0.31 | -5.464722  | 123.789     | sw | 42.4 | 9.2  | 0.14 | 0.29 | 1.006628034 | [38] |

|               |                 |      |      |      |      |            |             |    |      |      |      |      |             |      |
|---------------|-----------------|------|------|------|------|------------|-------------|----|------|------|------|------|-------------|------|
| Bathygobuis   | spp             | fish | 14   | 0.31 | 0.31 | -5.464722  | 123.789     | sw | 42.7 | 10.2 | 0.17 | 0.24 | 1.006628034 | [38] |
| Notolabrus    | celidotus       | fish | 28   | 0.03 | 0.03 | -43.603    | 172.84      | sw | 32.4 | 3.5  | 0.38 | 0.47 | 2.116022928 | [40] |
| Pagothenia    | borchgrevinki   | fish | 21   | NA   | 0.3  | -77.498275 | 165.00349   | sw | 15.2 | NA   | 0.54 | NA   | 0.466910075 | [41] |
| Trematomus    | pennelii        | fish | 21   | NA   | 0.3  | -77.498275 | 165.00349   | sw | 15.4 | NA   | 0.53 | NA   | 0.466910075 | [41] |
| Trematomus    | hansonii        | fish | 21   | NA   | 0.3  | -77.498275 | 165.00349   | sw | 15.4 | NA   | 0.39 | NA   | 0.466910075 | [41] |
| Trematomus    | bernacchii      | fish | 21   | NA   | 0.3  | -77.498275 | 165.00349   | sw | 15   | NA   | 0.24 | NA   | 0.466910075 | [41] |
| Gobionotothen | gibberifrons    | fish | 7    | NA   | 0.3  | -77.498275 | 165.00349   | sw | 17.9 | NA   | 0.31 | NA   | 0.466910075 | [41] |
| Notothenia    | coriiceps       | fish | 14   | NA   | 0.3  | -77.498275 | 165.00349   | sw | 17.4 | NA   | 0.20 | NA   | 0.466910075 | [41] |
| Dascyllus     | aruanus         | fish | 14   | 0.31 | 0.31 | -5.464722  | 123.789     | sw | 40.5 | 12   | 0.39 | 0.33 | 1.006628034 | [38] |
| Lycodichthys  | dearbornii      | fish | 21   | NA   | 0.3  | -77.498275 | 165.00349   | sw | 15.4 | NA   | 0.34 | NA   | 0.466910075 | [41] |
| Pachycara     | branchycephalum | fish | 21   | NA   | 0.3  | -77.498275 | 165.00349   | sw | 17.2 | NA   | 0.46 | NA   | 0.466910075 | [41] |
| Dasyatis      | sabina          | fish | 20   | 0.3  | 0.3  | 29.805767  | -85.354374  | sw | 43.2 | 0.8  | 0.31 | 0.41 | 4.381008048 | [42] |
| Campostoma    | anomalum        | fish | 14   | NA   | 1    | 39.516667  | -84.708333  | fw | 35.8 | NA   | 0.45 | NA   | 9.098       | [43] |
| Gila          | bicolor         | fish | 7    | 0.14 | 0.14 | 35.650789  | -117.66173  | fw | 36.2 | 2.8  | 0.23 | 0.37 | 8.042       | [44] |
| Pimephales    | promelas        | fish | 7    | NA   | 0.3  | 33.214841  | -97.133068  | fw | 40.4 | NA   | 0.45 | NA   | 7.996       | [45] |
| Rhinichthys   | osculus         | fish | 20   | NA   | 0.45 | 43.281888  | -110.019611 | fw | 34.6 | NA   | 0.03 | NA   | 8.237       | [46] |
| Rhinichthys   | osculus         | fish | 20   | NA   | 0.45 | 42.866111  | -109.864722 | fw | 34.9 | NA   | 0.33 | NA   | 9.164       | [46] |
| Cyprinodon    | variegatus      | fish | 30   | 0.1  | 0.1  | 26.065634  | -97.158582  | fw | 44.2 | 0.6  | 0.29 | 0.32 | 4.91        | [47] |
| Cyprinodon    | spp             | fish | 7    | NA   | 0.3  | 36.513859  | -116.977884 | fw | 43.6 | NA   | 0.23 | NA   | 9.28        | [48] |
| Cyprinodon    | macularis       | fish | 7    | NA   | 0.5  | 32.057499  | -111.666072 | fw | 43.2 | NA   | 0.30 | NA   | 7.001       | [49] |
| Cyprinodon    | nevadensis      | fish | 7    | 0.03 | 0.03 | 36.243562  | -116.856719 | fw | 42.7 | 0.8  | 0.14 | 0.17 | 9.116       | [50] |
| Poecilia      | sphenops        | fish | 30   | 1    | 1    | 17.033333  | -96.5       | fw | 43   | 7.5  | 0.30 | 0.30 | 1.346       | [51] |
| Gambusia      | affinis         | fish | 30   | NA   | 0.3  | 40.806281  | -111.947806 | fw | 42.1 | NA   | 0.36 | NA   | 9.093       | [52] |
| Gambusia      | affinis         | fish | 30   | NA   | 0.3  | 32.998333  | -109.9      | fw | 43.2 | NA   | 0.34 | NA   | 7.754       | [52] |
| Limia         | melanonotata    | fish | 10.5 | NA   | 0.3  | 18.221208  | -71.102408  | fw | 43   | NA   | 0.31 | NA   | 0.992       | [53] |
| Lepomis       | gibbosus        | fish | 14   | NA   | 0.3  | 46.285691  | -119.284462 | fw | 35.1 | NA   | 0.50 | NA   | 7.809       | [54] |
| Lepomis       | macrochirus     | fish | 14   | NA   | 1    | 33.289983  | -81.727939  | fw | 40.9 | NA   | 0.46 | NA   | 6.946       | [55] |
| Oncorhynchus  | kisutch         | fish | 14   | NA   | 0.3  | 46.285691  | -119.284462 | fw | 28.7 | NA   | 0.34 | NA   | 7.809       | [54] |

|               |              |        |    |      |       |           |            |    |      |      |       |      |       |      |
|---------------|--------------|--------|----|------|-------|-----------|------------|----|------|------|-------|------|-------|------|
| Oncorhynchus  | apache       | fish   | 14 | NA   | 0.02  | 33.691813 | -109.78924 | fw | 29.4 | NA   | 0.09  | NA   | 6.841 | [56] |
| Oncorhynchus  | gilae        | fish   | 14 | NA   | 0.02  | 33.301322 | -107.96392 | fw | 29.6 | NA   | 0.13  | NA   | 6.77  | [56] |
| Salmo         | salar        | fish   | 14 | NA   | 0.033 | 54.243864 | -3.004282  | fw | 32.7 | NA   | 0.02  | NA   | 4.623 | [57] |
| Salmo         | trutta       | fish   | 14 | NA   | 0.02  | 33.931329 | -109.58989 | fw | 29.9 | NA   | 0.09  | NA   | 6.014 | [56] |
| Salvelinus    | fontinalis   | fish   | 14 | NA   | 0.02  | 33.931329 | -109.58989 | fw | 29.8 | NA   | 0.11  | NA   | 6.014 | [56] |
| Thymallus     | arcticus     | fish   | 14 | NA   | 0.4   | 45.657306 | -112.9033  | fw | 29.3 | NA   | 0.25  | NA   | 7.809 | [58] |
| Cottus        | cognatus     | fish   | 14 | NA   | 0.5   | 41.88     | -87.63     | fw | 29.4 | NA   | 0.43  | NA   | 9.851 | [59] |
| Acipenser     | brevirostrum | fish   | 7  | NA   | 0.1   | 32.89     | NA         | fw | 35.1 | NA   | 0.30  | NA   | NA    | [60] |
| Prochilodus   | scrofa       | fish   | 30 | 0.1  | 0.1   | -22       | NA         | fw | 42.6 | 6.5  | 0.47  | 0.41 | NA    | [61] |
| Labeo         | rohita       | fish   | 30 | 0.3  | 0.3   | 18.9      | NA         | fw | 42.9 | 13.7 | 0.24  | 0.19 | NA    | [62] |
| Catla         | catla        | fish   | 30 | 0.3  | 0.3   | 20.44     | NA         | fw | 42.7 | 13.9 | 0.24  | 0.18 | NA    | [62] |
| Cirrhinus     | mrigala      | fish   | 30 | 0.3  | 0.3   | 20.63     | NA         | fw | 43.1 | 12.1 | 0.08  | 0.19 | NA    | [62] |
| Carassius     | auratus      | fish   | 20 | 0.3  | 0.3   | 24.45     | NA         | fw | 43.6 | 0.3  | 0.44  | 0.41 | NA    | [63] |
| Danio         | rerio        | fish   | 11 | 0.3  | 0.3   | 21.37     | NA         | fw | 41.7 | 6.2  | 0.25  | 0.44 | NA    | [64] |
| Tor           | putitora     | fish   | 30 | NA   | 0.3   | 21.95     | NA         | fw | 41.8 | NA   | 0.47  | NA   | NA    | [65] |
| Xiphophorus   | maculatus    | fish   | 7  | 0.13 | 0.13  | 21.9      | NA         | fw | 41.5 | 9.6  | 0.11  | 0.39 | NA    | [66] |
| Gasterosteus  | aculeatus    | fish   | NA | NA   | 0.25  | 38.57     | NA         | sw | 34.6 | NA   | 0.27  | NA   | NA    | [67] |
| Anabas        | testudineus  | fish   | 30 | 0.3  | 0.3   | 9.45      | NA         | fw | 41.9 | 12.4 | 0.17  | 0.15 | NA    | [68] |
| Micropterus   | salmoides    | fish   | 20 | 0.3  | 0.3   | 34.7      | NA         | fw | 38.5 | 3.2  | 0.31  | 0.75 | NA    | [69] |
| Pterophyllum  | scalare      | fish   | 30 | NA   | 1     | -2.17     | NA         | fw | 41.2 | NA   | 0.41  | NA   | NA    | [70] |
| Dicentrarchus | labrax       | fish   | 35 | 0.3  | 0.3   | 36.761069 | NA         | sw | 36   | 4.1  | 0.28  | 0.27 | NA    | [71] |
| Oncorhynchus  | mykiss       | fish   | 20 | 0.3  | 0.3   | 38.3      | NA         | fw | 29.8 | 0    | 0.18  | 0.20 | NA    | [69] |
| Oncorhynchus  | clarkii      | fish   | NA | NA   | 0.4   | 48.23     | NA         | sw | 29.9 | NA   | 0.23  | NA   | NA    | [72] |
| Sebastiscus   | marmoratus   | fish   | 14 | 0.08 | 0.08  | 23.57     | NA         | sw | 32.8 | 4.9  | 0.31  | 0.31 | NA    | [73] |
| Horabagrus    | brachysoma   | fish   | 30 | 0.3  | 0.3   | 21.85     | NA         | fw | 42.8 | 13.2 | 0.37  | 0.22 | NA    | [74] |
| Ictalurus     | punctatus    | fish   | 20 | 0.3  | 0.3   | 36.73     | NA         | fw | 40.3 | 2.7  | 0.39  | 0.71 | NA    | [69] |
| Pangasius     | pangasius    | fish   | 30 | 0.3  | 0.3   | 22.57     | NA         | fw | 44.1 | 12.4 | 0.17  | 0.60 | NA    | [75] |
| Chirodica     | chalcoptera  | insect | 7  | 0.25 | 0.25  | -33.6     | 18.58      | t  | 41.9 | 0.1  | -0.13 | 0.16 | 3.25  | [76] |

|               |            |        |   |      |      |            |           |   |      |      |       |       |       |      |
|---------------|------------|--------|---|------|------|------------|-----------|---|------|------|-------|-------|-------|------|
| Palirhoeus    | eatoni     | insect | 7 | 0.25 | 0.25 | -46.896448 | 37.750885 | t | 36.9 | -3.6 | 0.07  | 0.10  | 1.376 | [77] |
| Palirhoeus    | eatoni     | insect | 7 | 0.25 | 0.25 | -53.08181  | 73.504158 | t | 35.6 | -5.4 | -0.28 | -0.19 | 2.314 | [77] |
| Bothrometopus | randi      | insect | 7 | 0.25 | 0.25 | -46.896448 | 37.750885 | t | 36.3 | -4.5 | 0.05  | 0.09  | 1.376 | [77] |
| Bothrometopus | parvulus   | insect | 7 | 0.25 | 0.25 | -46.896448 | 37.750885 | t | 38   | -4.7 | -0.01 | 0.09  | 1.376 | [77] |
| Bothrometopus | parvulus   | insect | 7 | 0.25 | 0.25 | -46.896448 | 37.750885 | t | 38.7 | -5.3 | 0.01  | 0.17  | 1.376 | [77] |
| Bothrometopus | parvulus   | insect | 7 | 0.25 | 0.25 | -46.896448 | 37.750885 | t | 38.2 | -4.6 | 0.01  | 0.10  | 1.376 | [77] |
| Bothrometopus | parvulus   | insect | 7 | 0.25 | 0.25 | -46.896448 | 37.750885 | t | 38.4 | -5.5 | 0.03  | 0.14  | 1.376 | [77] |
| Bothrometopus | parvulus   | insect | 7 | 0.25 | 0.25 | -46.896448 | 37.750885 | t | 39.4 | -6.2 | 0.09  | 0.17  | 1.376 | [77] |
| Bothrometopus | parvulus   | insect | 7 | 0.25 | 0.25 | -46.896448 | 37.750885 | t | 38.1 | -5.3 | -0.02 | 0.11  | 1.376 | [77] |
| Bothrometopus | elongatus  | insect | 7 | 0.25 | 0.25 | -46.896448 | 37.750885 | t | 38.4 | -5.2 | -0.01 | 0.15  | 1.376 | [77] |
| Bothrometopus | elongatus  | insect | 7 | 0.25 | 0.25 | -46.896448 | 37.750885 | t | 38.1 | -4.5 | -0.03 | 0.07  | 1.376 | [77] |
| Bothrometopus | elongatus  | insect | 7 | 0.25 | 0.25 | -46.896448 | 37.750885 | t | 38.5 | -6.3 | 0.01  | 0.16  | 1.376 | [77] |
| Bothrometopus | elongatus  | insect | 7 | 0.25 | 0.25 | -46.896448 | 37.750885 | t | 39   | -6.6 | 0.11  | 0.16  | 1.376 | [77] |
| Bothrometopus | elongatus  | insect | 7 | 0.25 | 0.25 | -46.896448 | 37.750885 | t | 37.4 | -5.5 | 0.10  | 0.10  | 1.376 | [77] |
| Ectemnorhinus | marioni    | insect | 7 | 0.25 | 0.25 | -46.896448 | 37.750885 | t | 37.2 | -5.5 | 0.04  | 0.13  | 1.376 | [77] |
| Ectemnorhinus | marioni    | insect | 7 | 0.25 | 0.25 | -46.896448 | 37.750885 | t | 37.5 | -4.7 | -0.03 | -0.03 | 1.376 | [77] |
| Ectemnorhinus | marioni    | insect | 7 | 0.25 | 0.25 | -46.896448 | 37.750885 | t | 37.4 | -5.5 | 0.09  | 0.13  | 1.376 | [77] |
| Ectemnorhinus | marioni    | insect | 7 | 0.25 | 0.25 | -46.896448 | 37.750885 | t | 38.2 | -4.6 | 0.01  | 0.07  | 1.376 | [77] |
| Ectemnorhinus | similis    | insect | 7 | 0.25 | 0.25 | -46.896448 | 37.750885 | t | 38.3 | -5   | 0.06  | 0.10  | 1.376 | [77] |
| Ectemnorhinus | similis    | insect | 7 | 0.25 | 0.25 | -46.896448 | 37.750885 | t | 38   | -6   | 0.03  | 0.13  | 1.376 | [77] |
| Ectemnorhinus | similis    | insect | 7 | 0.25 | 0.25 | -46.896448 | 37.750885 | t | 39   | -5.8 | 0.15  | 0.09  | 1.376 | [77] |
| Ectemnorhinus | similis    | insect | 7 | 0.25 | 0.25 | -46.896448 | 37.750885 | t | 39.3 | -5.2 | 0.13  | 0.10  | 1.376 | [77] |
| Canonopsis    | sericeus   | insect | 7 | 0.25 | 0.25 | -53.08181  | 73.504158 | t | 38.8 | -5.9 | -0.03 | -0.12 | 2.314 | [77] |
| Canonopsis    | sericeus   | insect | 7 | 0.25 | 0.25 | -53.08181  | 73.504158 | t | 39.9 | -5.5 | -0.35 | -0.03 | 2.314 | [77] |
| Bothrometopus | brevis     | insect | 7 | 0.25 | 0.25 | -53.08181  | 73.504158 | t | 36.5 | -5.1 | -0.24 | 0.01  | 2.314 | [77] |
| Bothrometopus | brevis     | insect | 7 | 0.25 | 0.25 | -53.08181  | 73.504158 | t | 35.8 | -5.4 | 0.17  | 0.05  | 2.314 | [77] |
| Bothrometopus | gracilipes | insect | 7 | 0.25 | 0.25 | -53.08181  | 73.504158 | t | 37.5 | -6   | -0.45 | 0.17  | 2.314 | [77] |
| Ectemnorhinus | viridis    | insect | 7 | 0.25 | 0.25 | -53.08181  | 73.504158 | t | 35.1 | -4.6 | -0.05 | 0.03  | 2.314 | [77] |



|                |             |        |     |      |      |            |             |    |      |      |      |       |       |      |
|----------------|-------------|--------|-----|------|------|------------|-------------|----|------|------|------|-------|-------|------|
| Ectemnorhinus  | viridis     | insect | 7   | 0.25 | 0.25 | -53.08181  | 73.504158   | t  | 36.5 | -6.1 | 0.12 | 0.23  | 2.314 | [77] |
| Halmaeus       | atriceps    | insect | 7   | 0.5  | 0.5  | -46.9      | 37.75       | t  | 32.4 | -4.1 | 0.12 | 0.15  | 1.376 | [78] |
| Anopheles      | funestus    | insect | 6   | 0.25 | 0.25 | -25.256988 | 32.537274   | t  | 40.9 | 7.7  | 0.14 | 0.18  | 2.784 | [79] |
| Anopheles      | arabiensis  | insect | 6   | 0.25 | 0.25 | -15.627463 | 30.419199   | t  | 40.3 | 7.7  | 0.20 | 0.19  | 3.108 | [79] |
| Culex          | pipiens     | insect | 4.5 | NA   | 0.5  | 38.833882  | -104.821363 | t  | 43.4 | NA   | 0.11 | NA    | 8.057 | [80] |
| Drosophila     | putrida     | insect | 5   | NA   | 0.5  | 35.106077  | -82.625856  | t  | 41.3 | NA   | 0.05 | NA    | 7.085 | [81] |
| Drosophila     | falleni     | insect | 5   | NA   | 0.5  | 35.106077  | -82.625856  | t  | 40.4 | NA   | 0.04 | NA    | 7.085 | [81] |
| Drosophila     | tripunctata | insect | 5   | NA   | 0.5  | 35.106077  | -82.625856  | t  | 40.1 | NA   | 0.03 | NA    | 7.085 | [81] |
| Glossina       | pallidipes  | insect | 10  | 0.25 | 0.25 | 0.692778   | 34.181111   | t  | 44.4 | 4.5  | 0.03 | 0.27  | 0.706 | [82] |
| Castanophlebia | spp         | insect | 2   | NA   | 0.34 | -33.461667 | 19.616389   | fw | 32.9 | NA   | 0.19 | NA    | 4.244 | [83] |
| Lestagella     | penicillata | insect | 2   | NA   | 0.34 | -33.461667 | 19.616389   | fw | 31.7 | NA   | 0.16 | NA    | 4.244 | [83] |
| Lestagella     | penicillata | insect | 2   | NA   | 0.34 | -33.944167 | 19.024722   | fw | 30.8 | NA   | 0.34 | NA    | 3.134 | [83] |
| Sigara         | lateralis   | insect | 3   | 1    | 1    | 37.042729  | -6.434447   | t  | 46.6 | -7.2 | 0.05 | 0.02  | 5.171 | [84] |
| Nezara         | viridula    | insect | 7   | 0.25 | 0.25 | -29.692778 | 152.932222  | t  | 46.4 | 0.2  | 0.05 | 0.16  | 3.944 | [85] |
| Nezara         | viridula    | insect | 7   | 0.25 | 0.25 | -31.248333 | 150.467222  | t  | 46.1 | 0.2  | 0.07 | 0.16  | 5.364 | [85] |
| Linepithema    | humile      | insect | 7   | 0.05 | 0.05 | -33.916667 | 18.85       | t  | 40   | 0    | 0.08 | 0.03  | 3.416 | [86] |
| Hodotermes     | mossambicus | insect | 15  | 1    | 1    | -28        | 25.5        | t  | 48.5 | 5.2  | 0.16 | 0.14  | 5.349 | [87] |
| Embryonopsis   | halticella  | insect | 7   | 0.5  | 0.5  | -46.9      | 37.75       | t  | 42.8 | -0.5 | 0.18 | -0.02 | 1.376 | [88] |
| Nuerocordulia  | alabamensis | insect | 2   | NA   | 2    | 33.289983  | -81.727939  | fw | 39   | NA   | 0.11 | NA    | 6.946 | [89] |
| Epitheca       | cynosura    | insect | 2   | NA   | 2    | 33.289983  | -81.727939  | fw | 41.4 | NA   | 0.07 | NA    | 6.946 | [89] |
| Ladona         | deplanata   | insect | 2   | NA   | 2    | 33.289983  | -81.727939  | fw | 41.8 | NA   | 0.05 | NA    | 6.946 | [89] |
| Celithemis     | spp         | insect | 2   | NA   | 2    | 33.289983  | -81.727939  | fw | 42.2 | NA   | 0.15 | NA    | 6.946 | [89] |
| Libellula      | auripennis  | insect | 2   | NA   | 2    | 33.289983  | -81.727939  | fw | 44   | NA   | 0.12 | NA    | 6.946 | [89] |
| Libellula      | auripennis  | insect | 2   | NA   | 2    | 33.289983  | -81.727939  | fw | 45.6 | NA   | 0.23 | NA    | 6.946 | [89] |
| Pachydiplax    | longipennis | insect | 2   | NA   | 2    | 33.289983  | -81.727939  | fw | 43.5 | NA   | 0.11 | NA    | 6.946 | [89] |
| Pachydiplax    | longipennis | insect | 2   | NA   | 2    | 33.289983  | -81.727939  | fw | 44.1 | NA   | 0.15 | NA    | 6.946 | [89] |
| Macromia       | illinoensis | insect | 2   | NA   | 2    | 33.289983  | -81.727939  | fw | 39.5 | NA   | 0.06 | NA    | 6.946 | [89] |
| Hydropsyche    | simulans    | insect | 3   | NA   | 0.3  | 32.937622  | -98.246992  | fw | 37.4 | NA   | 0.22 | NA    | 8.019 | [90] |

|                |                 |        |     |       |       |           |             |    |      |      |       |      |        |       |
|----------------|-----------------|--------|-----|-------|-------|-----------|-------------|----|------|------|-------|------|--------|-------|
| Chimarra       | obscura         | insect | 3   | NA    | 0.3   | 32.937622 | -98.246992  | fw | 38.3 | NA   | 0.49  | NA   | 8.019  | [90]  |
| Blaptica       | dubia           | insect | 7   | NA    | 1     | -14.33    | NA          | t  | 49.2 | NA   | 0.06  | NA   | NA     | [91]  |
| Eublaberus     | posticus        | insect | 7   | NA    | 1     | -12.035   | NA          | t  | 47.3 | NA   | 0.02  | NA   | NA     | [91]  |
| Blaberus       | discoidalis     | insect | 7   | NA    | 1     | 18.1      | NA          | t  | 45.6 | NA   | -0.03 | NA   | NA     | [91]  |
| Merizodus      | soledadinus     | insect | 7   | 0.5   | 0.5   | -54.28    | NA          | t  | 38   | -5.5 | 0.01  | 0.16 | NA     | [92]  |
| Cyrtobagous    | salvineae       | insect | 7   | 0.25  | 0.25  | -26.4     | NA          | t  | 47.9 | 6.4  | 0.04  | 0.11 | NA     | [93]  |
| Tenebrio       | molitor         | insect | 7   | 0.25  | 0.25  | 53.73     | NA          | t  | 44.9 | 3    | 0.10  | 0.22 | NA     | [93]  |
| Ceratitis      | capitata        | insect | 10  | 0.25  | 0.25  | 34.55     | NA          | t  | 42   | 6.4  | 0.15  | 0.23 | NA     | [94]  |
| Trichocorixa   | verticalis      | insect | 3   | 1     | 1     | 36.84     | NA          | t  | 44.9 | -6.4 | 0.22  | 0.03 | NA     | [84]  |
| Nilaparvata    | lugens          | insect | 18  | 0.5   | 0.5   | 25.415    | NA          | t  | 37.3 | 8.1  | 0.09  | 0.56 | NA     | [95]  |
| Solenopsis     | invicta         | insect | 7   | 1     | 0.43  | -25.34    | NA          | t  | 41.8 | 1.1  | 0.10  | 0.15 | NA     | [96]  |
| Cydia          | pomonella       | insect | 6   | 0.25  | 0.25  | 52.62     | NA          | t  | 43.7 | 0    | 0.17  | 0.32 | NA     | [97]  |
| Phrynocephalus | guinanensis     | rept   | 21  | 0.175 | 0.175 | 35.57     | 101.08      | t  | 46.6 | 1.9  | 0.08  | 0.17 | 8.064  | [98]  |
| Phrynocephalus | vlangalii       | rept   | 21  | 0.175 | 0.175 | 36.57     | 101.82      | t  | 46.5 | 1.4  | 0.12  | 0.23 | 8.449  | [98]  |
| Phrynocephalus | versicolor      | rept   | 21  | 0.175 | 0.175 | 41.45     | 106.98      | t  | 47.1 | 4.8  | 0.04  | 0.40 | 11.905 | [98]  |
| Anolis         | distichus       | rept   | 7   | NA    | NA    | 25.73079  | -80.237708  | t  | 40.6 | NA   | 0.20  | NA   | 3.071  | [99]  |
| Anolis         | sagrei          | rept   | 7   | NA    | NA    | 25.73079  | -80.237708  | t  | 41.9 | NA   | 0.14  | NA   | 3.071  | [99]  |
| Takydromus     | septentrionalis | rept   | 21  | 0.25  | 0.25  | 29.93     | 121.85      | t  | 44.4 | 4.9  | 0.15  | 0.22 | 7.915  | [100] |
| Eremias        | argus           | rept   | 21  | 0.25  | 0.25  | 36.1      | 111.33      | t  | 45   | 8    | 0.04  | 0.25 | 9.705  | [101] |
| Eremias        | brenchleyi      | rept   | 21  | 0.25  | 0.25  | 33.63     | 116.98      | t  | 44.5 | 5    | 0.20  | 0.42 | 9.542  | [101] |
| Eremias        | multiocellata   | rept   | 21  | 0.25  | 0.25  | 41.45     | 106.98      | t  | 43.5 | 9.2  | 0.24  | 0.28 | 11.905 | [101] |
| Takydromus     | hsuehshanensis  | rept   | 14  | 0.75  | 0.75  | 23.84     | 120.99      | t  | 44.1 | 2.1  | 0.05  | 0.13 | 3.11   | [102] |
| Takydromus     | stejnegeri      | rept   | 14  | 0.75  | 0.75  | 25.09     | 121.56      | t  | 43.7 | 5.2  | 0.05  | 0.05 | 4.713  | [102] |
| Takydromus     | formosanus      | rept   | 14  | 0.75  | 0.75  | 25.09     | 121.56      | t  | 43.3 | 4.5  | 0.03  | 0.12 | 4.713  | [102] |
| Thamnophis     | elegans         | rept   | 13  | NA    | NA    | 40.802481 | -105.591663 | t  | 44.3 | NA   | 0.03  | NA   | 7.568  | [103] |
| Uta            | mearnsii        | rept   | 8.5 | NA    | 0.02  | 33.93     | -116.64     | t  | 44.8 | NA   | 0.11  | NA   | 6.47   | [104] |
| Urosaurus      | ornatus         | rept   | 8   | NA    | 0.02  | 32.271892 | -110.843499 | t  | 44.5 | NA   | 0.13  | NA   | 7.067  | [105] |
| Shenomorphus   | taiwanensis     | rept   | 14  | 0.75  | 0.75  | 23.84     | 120.99      | t  | 38.4 | 5.3  | 0.06  | 0.17 | 3.11   | [106] |

|              |                |      |    |      |      |           |            |   |      |      |       |      |       |       |
|--------------|----------------|------|----|------|------|-----------|------------|---|------|------|-------|------|-------|-------|
| Shenomorphus | incognitus     | rept | 14 | 0.75 | 0.75 | 22.04     | 121.55     | t | 41.5 | 11.7 | 0.22  | 0.09 | 2.581 | [106] |
| Trimeresurus | gracilis       | rept | 14 | 0.25 | 0.25 | 23.84     | 120.99     | t | 38.3 | 3.7  | 0.04  | 0.20 | 3.11  | [107] |
| Trimeresurus | stejnegeri     | rept | 14 | 0.25 | 0.25 | 25.09     | 121.56     | t | 38.9 | 5.6  | 0.04  | 0.13 | 4.713 | [107] |
| Trimeresurus | mucrosquamatus | rept | 14 | 0.25 | 0.25 | 25.09     | 121.56     | t | 38.6 | 3.5  | 0.05  | 0.21 | 4.713 | [107] |
| Chelydra     | serpentina     | rept | 21 | NA   | 1    | 42.964303 | -78.950037 | t | 41.4 | NA   | 0.18  | NA   | 9.189 | [108] |
| Chrysemys    | picta          | rept | 14 | NA   | NA   | 41.480379 | -71.52256  | t | 41   | NA   | 0.07  | NA   | 8.176 | [109] |
| Anolis       | carolinensis   | rept | 14 | 0.75 | 1    | 30.3      | NA         | t | 45.1 | 11.1 | 0.16  | 0.27 | NA    | [110] |
| Nerodia      | rhubifera      | rept | 14 | NA   | NA   | 33.74     | NA         | t | 41   | 6    | 0.07  | 0.17 | NA    | [111] |
| Thamnophis   | proximus       | rept | 14 | NA   | NA   | 33.74     | NA         | t | 42   | 4.2  | 0.21  | 0.24 | NA    | [111] |
| Sceloporus   | occidentalis   | rept | 14 | 0.75 | 1    | 35.9      | NA         | t | 44.5 | 8.9  | -0.01 | 0.30 | NA    | [110] |
| Phrynosoma   | cornutum       | rept | 14 | 0.75 | 1    | 31.7      | NA         | t | 48   | 6.1  | 0.06  | 0.25 | NA    | [110] |
| Xantusia     | vigilis        | rept | 14 | 0.75 | 1    | 30.6      | NA         | t | 44   | 4.2  | 0.20  | 0.20 | NA    | [110] |
| Pelodiscus   | sinensis       | rept | 28 | 0.3  | 0.3  | 23.19     | NA         | t | 41.8 | 2.6  | 0.14  | 0.12 | NA    | [112] |

1. Claussen D.L. 1973 The thermal relations of the tailed frog, *Ascaphus truei*, and the pacific treefrog, *Hyla regilla*. *Comparative Biochemistry and Physiology Part A: Physiology* **44**(1), 137-153.
2. Brattstrom B.H. 1968 Thermal acclimation in anuran amphibians as a function of latitude and altitude. *Comparative Biochemistry and Physiology* **24**(1), 93-111.
3. Christian K.A., Nunez F., Clos L., Diaz L. 1988 Thermal relations of some tropical frogs along an altitudinal gradient. *Biotropica* **20**, 236-239.
4. Brattstrom B.H. 1970 Thermal acclimation in Australian amphibians. *Comparative Biochemistry and Physiology* **35**(1), 69-103.
5. Dunlap D.G. 1968 Critical thermal maximum as a function of temperature of acclimation in two species of hylid frogs. *Physiological Zoology* **41**, 432-439.
6. Brattstrom B.H., Regal P. 1965 Rate of thermal acclimation in the Mexican salamander *Chiropterotriton*. *Copeia*, 514-515.
7. Holzman N., McManus J.J. 1973 Effects of acclimation on metabolic rate and thermal tolerance in the carpenter frog, *Rana vergatipes*. *Comparative Biochemistry and Physiology Part A: Physiology* **45**(3), 833-842.

8. Chen T.-C., Kam Y.-C., Lin Y.-S. 2001 Thermal physiology and reproductive phenology of *Buergeria japonica* (Rhacophoridae) breeding in a stream and a geothermal hot spring in Taiwan. *Zoological Science* **18**(4), 591-596.
9. Claussen D.L. 1977 Thermal acclimation in ambystomatid salamanders. *Comparative Biochemistry and Physiology--Part A: Physiology* **58**(4), 333-340.
10. Hutchison V.H. 1961 Critical thermal maxima in salamanders. *Physiological Zoology* **34**, 92-125.
11. Hutchison V.H., Engbretson G., Turney D. 1973 Thermal acclimation and tolerance in the hellbender, *Cryptobranchus alleganiensis*. *Copeia*, 805-807.
12. Hutchison V.H., Rowlan S.D. 1975 Thermal acclimation and tolerance in the mudpuppy, *Necturus maculosus*. *Journal of Herpetology* **9**(4), 367-368.
13. Layne J.R., Claussen D.L. 1982 The time courses of CTMax and CTMin acclimation in the salamander *Desmognathus fuscus*. *Journal of Thermal Biology* **7**(3), 139-141.
14. Layne Jr J.R., Claussen D.L. 1982 Seasonal variation in the thermal acclimation of critical thermal maxima (CTMax) and minima (CTMin) in the salamander *Eurycea bislineata*. *Journal of Thermal Biology* **7**(1), 29-33.
15. Layne Jr J.R., Claussen D.L. 1987 Time courses of thermal acclimation for critical thermal minima in the salamanders *Desmognathus quadramaculatus*, *Desmognathus monticola*, *Desmognathus ochrophaeus*, and *Plethodon jordani*. *Comparative Biochemistry and Physiology Part A: Physiology* **87**(4), 895-898.
16. Gvozdík L., Puky M., Šugerková M. 2007 Acclimation is beneficial at extreme test temperatures in the Danube crested newt, *Triturus dobrogicus* (Caudata, Salamandridae). *Biological Journal of the Linnean Society* **90**(4), 627-636.
17. Cuculescu M., Hyde D., Bowler K. 1998 Thermal tolerance of two species of marine crab, *Cancer pagurus* and *Carcinus maenas*. *Journal of Thermal Biology* **23**(2), 107-110.
18. Magozzi S., Calosi P. 2015 Integrating metabolic performance, thermal tolerance, and plasticity enables for more accurate predictions on species vulnerability to acute and chronic effects of global warming. *Global Change Biology* **21**(1), 181-194.
19. Reiser S. 2013 Coping with extreme temperatures: Thermal preference and critical lower thermal limits of the common brown shrimp (*Crangon crangon*, L.), Hamburg, Universität Hamburg, Dissertation, 2013.
20. Ravaux J., Léger N., Rabet N., Morini M., Zbinden M., Thatje S., Shillito B. 2012 Adaptation to thermally variable environments: capacity for acclimation of thermal limit and heat shock response in the shrimp *Palaemonetes varians*. *Journal of Comparative Physiology B* **182**(7), 899-907.
21. Re A.D., Diaz F., Sierra E., Rodríguez J., Perez E. 2005 Effect of salinity and temperature on thermal tolerance of brown shrimp *Farfantepenaeus aztecus* (Ives)(Crustacea, Penaeidae). *Journal of Thermal Biology* **30**(8), 618-622.

22. McGaw I. 2003 Behavioral thermoregulation in *Hemigrapsus nudus*, the amphibious purple shore crab. *The Biological Bulletin* **204**(1), 38-49.
23. Kivivuori L., Lagerspetz K.Y. 1990 Thermal resistance and behaviour of the isopod *Saduria entomon* (L.). *Ann Zool Fennici* **27**, 287-290.
24. Buchanan J.A., Stewart B.A., Davies B.R. 1988 Thermal acclimation and tolerance to lethal high temperature in the mountain stream amphipod *Paramelita nigroculus* (Barnard). *Comparative Biochemistry and Physiology Part A: Physiology* **89**(3), 425-431.
25. Morritt D., Ingólfsson A. 2000 Upper thermal tolerances of the beachflea *Orchestia gammarellus* (Pallas)(Crustacea: Amphipoda: Talitridae) associated with hot springs in Iceland. *Journal of Experimental Marine Biology and Ecology* **255**(2), 215-227.
26. Claussen D.L. 1980 Thermal acclimation in the crayfish, *Orconectes rusticus* and *O. virilis*. *Comparative Biochemistry and Physiology Part A: Physiology* **66**(3), 377-384.
27. Rodríguez M.H., Bückle Ramirez L.F., Díaz Herrera F. 1996 Critical thermal maximum of *Macrobrachium tenellum*. *Journal of Thermal Biology* **21**(2), 139-143.
28. Díaz F., Sierra E., Denisse Re A., Rodríguez L. 2002 Behavioural thermoregulation and critical thermal limits of *Macrobrachium acanthurus* (Wiegman). *Journal of Thermal Biology* **27**(5), 423-428.
29. Selvakumar S., Geraldine P. 2005 Heat shock protein induction in the freshwater prawn *Macrobrachium malcolmsonii*: Acclimation-influenced variations in the induction temperatures for Hsp70. *Comparative Biochemistry and Physiology Part A: Molecular & Integrative Physiology* **140**(2), 209-215.
30. Lagerspetz K., Bowler K. 1993 Variation in heat tolerance in individual *Asellus aquaticus* during thermal acclimation. *Journal of Thermal Biology* **18**(3), 137-143.
31. Camacho J., Qadri S.A., Wang H., Worden M.K. 2006 Temperature acclimation alters cardiac performance in the lobster *Homarus americanus*. *Journal of Comparative Physiology A* **192**(12), 1327-1334.
32. Herrera F.D.a., Sierra Uribe E., Fernando Bückle Ramirez L., Garrido Mora A. 1998 Critical thermal maxima and minima of *Macrobrachium rosenbergii* (Decapoda: Palaemonidae). *Journal of Thermal Biology* **23**(6), 381-385.
33. Kumlu M., Türkmen S., Kumlu M. 2010 Thermal tolerance of *Litopenaeus vannamei* (Crustacea: Penaeidae) acclimated to four temperatures. *Journal of Thermal Biology* **35**(6), 305-308.
34. Hoang T., Lee S.Y., Keenan C.P., Marsden G.E. 2002 Cold tolerance of the banana prawn *Penaeus merguensis* de Man and its growth at different temperatures. *Aquaculture Research* **33**(1), 21-26.

35. Kir M., Kumlu M. 2008 Effect of temperature and salinity on low thermal tolerance of *Penaeus semisulcatus* (Decapoda: Penaeidae). *Aquaculture Research* **39**(10), 1101-1106.
36. Qari S., Aljarari R. 2014 The effect of season and acclimation on the heat and cold tolerance of the Red Sea crab, *Portunus pelagicus*. *Life Science Journal* **11**(4), 145-148.
37. Fangué N.A., Hofmeister M., Schulte P.M. 2006 Intraspecific variation in thermal tolerance and heat shock protein gene expression in common killifish, *Fundulus heteroclitus*. *Journal of Experimental Biology* **209**(15), 2859-2872.
38. Eme J., Bennett W.A. 2009 Critical thermal tolerance polygons of tropical marine fishes from Sulawesi, Indonesia. *Journal of Thermal Biology* **34**(5), 220-225.
39. Davis B. 1977 Distribution and temperature adaptation in the teleost fish genus *Gibbonsia*. *Marine Biology* **42**(4), 315-320.
40. Hooper J.K. 2008 The effect of temperature change on the New Zealand marine fish, *Notolabrus celidotus*.
41. Bilyk K.T., DeVries A.L. 2011 Heat tolerance and its plasticity in Antarctic fishes. *Comparative Biochemistry and Physiology Part A: Molecular & Integrative Physiology* **158**(4), 382-390.
42. Fangué N.A., Bennett W.A., Douglas M. 2003 Thermal tolerance responses of laboratory-acclimated and seasonally acclimatized Atlantic stingray, *Dasyatis sabina*. *Copeia* **2003**(2), 315-325.
43. Chagnon N., Hlohowskyj I. 1989 Effects of phenol exposure on the thermal tolerance ability of the central stoneroller minnow. *Bulletin of Environmental Contamination and Toxicology* **42**(4), 614-619.
44. McClanahan L.L., Feldmeth C.R., Jones J., Soltz D.L. 1986 Energetics, salinity and temperature tolerance in the Mohave tui chub, *Gila bicolor mohavensis*. *Copeia*, 45-52.
45. Richards V., Beitinger T. 1995 Reciprocal influences of temperature and copper on survival of fathead minnows, *Pimephales promelas*. *Bulletin of Environmental Contamination and Toxicology* **55**(2), 230-236.
46. Kaya C.M., Brussard P.F., Cameron D.G., Vyse E.R. 1992 Biochemical genetics and thermal tolerances of Kendall Warm Springs dace (*Rhinichthys osculus thermalis*) and Green River speckled dace (*R. o. yarrowi*). *Copeia*, 528-535.
47. Bennett W.A., Beitinger T.L. 1997 Temperature tolerance of the sheepshead minnow, *Cyprinodon variegatus*. *Copeia*, 77-87.
48. Otto R.G., Gerking S.D. 1973 Heat tolerance of a Death Valley pupfish (genus *Cyprinodon*). *Physiological Zoology* **46**, 43-49.
49. Lowe C.H., Heath W.G. 1969 Behavioral and physiological responses to temperature in the desert pupfish *Cyprinodon macularius*. *Physiological Zoology* **42**, 53-59.

50. Feldmeth C.R., Stone E.A., Brown J.H. 1974 An increased scope for thermal tolerance upon acclimating pupfish (*Cyprinodon*) to cycling temperatures. *Journal of Comparative Physiology* **89**(1), 39-44.
51. Hernández M.R., Bückle R.F. 2002 Temperature tolerance polygon of *Poecilia sphenops* Valenciennes (Pisces: Poeciliidae). *Journal of Thermal Biology* **27**(1), 1-5.
52. Otto R.G. 1973 Temperature tolerance of the mosquitofish, *Gambusia affinis* (Baird and Girard). *Journal of Fish Biology* **5**(5), 575-585.
53. Haney D.C., Walsh S.J. 2003 Influence of salinity and temperature on the physiology of *Limia melanonotata* (Cyprinodontiforme: Poeciliidae): a search for abiotic factors limiting insular distribution in Hispaniola. *Caribbean Journal of Science* **39**(3), 327-337.
54. Becker C.D., Genoway R.G. 1979 Evaluation of the critical thermal maximum for determining thermal tolerance of freshwater fish. *Environmental Biology of Fishes* **4**(3), 245-256.
55. Holland W.E., Smith M.H., Gibbons J.W., Brown D.H. 1974 Thermal tolerances of fish from a reservoir receiving heated effluent from a nuclear reactor. *Physiological Zoology* **47**, 110-118.
56. Lee R.M., Rinne J.N. 1980 Critical thermal maxima of five trout species in the southwestern United States. *Transactions of the American Fisheries Society* **109**(6), 632-635.
57. Elliott J., Elliott J. 1995 The effect of the rate of temperature increase on the critical thermal maximum for parr of Atlantic salmon and brown trout. *Journal of Fish Biology* **47**(5), 917-919.
58. Lohr S., Byorth P.A., Kaya C., Dwyer W. 1996 High-temperature tolerances of fluvial Arctic grayling and comparisons with summer river temperatures of the Big Hole River, Montana. *Transactions of the American Fisheries Society* **125**(6), 933-939.
59. Otto R.G., Rice J.O.H. 1977 Responses of a freshwater sculpin (*Cottus cognatus gracilis*) to temperature. *Transactions of the American Fisheries Society* **106**(1), 89-94.
60. Ziegeweid J.R., Jennings C.A., Peterson D.L. 2008 Thermal maxima for juvenile shortnose sturgeon acclimated to different temperatures. *Environmental Biology of Fishes* **82**(3), 299-307.
61. Barrionuevo W., Femandes M. 1995 Critical thermal maxima and minima for curimbatá, *Prochilodus scrofa* Steindachner, of two different sizes. *Aquaculture Research* **26**(6), 447-450.
62. Das T., Pal A., Chakraborty S., Manush S., Chatterjee N., Mukherjee S. 2004 Thermal tolerance and oxygen consumption of Indian Major Carps acclimated to four temperatures. *Journal of Thermal Biology* **29**(3), 157-163.
63. Ford T., Beitinger T.L. 2005 Temperature tolerance in the goldfish, *Carassius auratus*. *Journal of Thermal Biology* **30**(2), 147-152.

64. Cortemeglia C., Beitinger T.L. 2005 Temperature tolerances of wild-type and red transgenic zebra danios. *Transactions of the American Fisheries Society* **134**(6), 1431-1437.
65. Akhtar M., Pal A., Sahu N., Ciji A., Mahanta P. 2013 Thermal tolerance, oxygen consumption and haemato-biochemical variables of *Tor putitora* juveniles acclimated to five temperatures. *Fish Physiology and Biochemistry* **39**(6), 1387-1398.
66. Prodocimo V., Freire C.A. 2001 Critical thermal maxima and minima of the platyfish *Xiphophorus maculatus* Günther (Poeciliidae, Cyprinodontiformes)–a tropical species of ornamental freshwater fish. *Revista Brasileira de Zoologia* **18**(Supl 1), 97-106.
67. Feldmeth C.R., Baskin J.N. 1976 Thermal and respiratory studies with reference to temperature and oxygen tolerance for the unarmored stickleback *Gasterosteus aculeatus williamsoni* Hubbs. *Bulletin of the Southern California Academy of Sciences* **75**(2), 127-131.
68. Sarma K., Pal A., Ayyappan S., Das T., Manush S., Debnath D., Baruah K. 2010 Acclimation of *Anabas testudineus* (Bloch) to three test temperatures influences thermal tolerance and oxygen consumption. *Fish physiology and biochemistry* **36**(1), 85-90.
69. Currie R.J., Bennett W.A., Beitinger T.L. 1998 Critical thermal minima and maxima of three freshwater game-fish species acclimated to constant temperatures. *Environmental Biology of Fishes* **51**(2), 187-200.
70. Pérez E., Díaz F., Espina S. 2003 Thermoregulatory behavior and critical thermal limits of the angelfish *Pterophyllum scalare* (Lichtenstein)(Pisces: Cichlidae). *Journal of Thermal Biology* **28**(8), 531-537.
71. Dülger N., Kumlu M., Türkmen S., Ölçülü A., Tufan Eroldoğan O., Asuman Yılmaz H., Öçal N. 2012 Thermal tolerance of European Sea Bass (*Dicentrarchus labrax*) juveniles acclimated to three temperature levels. *Journal of Thermal Biology* **37**(1), 79-82.
72. Heath W.G. 1963 Thermoperiodism in sea-run cutthroat trout (*Salmo clarki clarki*). *Science* **142**(3591), 486-488.
73. Kita J., Tsuchida S., Setoguma T. 1996 Temperature preference and tolerance, and oxygen consumption of the marbled rockfish, *Sebastes marmoratus*. *Marine Biology* **125**(3), 467-471.
74. Dalvi R.S., Pal A.K., Tiwari L.R., Das T., Baruah K. 2009 Thermal tolerance and oxygen consumption rates of the catfish *Horabagrus brachysoma* (Günther) acclimated to different temperatures. *Aquaculture* **295**(1), 116-119.
75. Debnath D., Pal A., Sahu N., Baruah K., Yengkokpam S., Das T., Manush S. 2006 Thermal tolerance and metabolic activity of yellowtail catfish *Pangasius pangasius* (Hamilton) advanced fingerlings with emphasis on their culture potential. *Aquaculture* **258**(1), 606-610.



76. Terblanche J.S., Sinclair B.J., Jaco Klok C., McFarlane M.L., Chown S.L. 2005 The effects of acclimation on thermal tolerance, desiccation resistance and metabolic rate in *Chirodica chalconota* (Coleoptera: Chrysomelidae). *Journal of Insect Physiology* **51**(9), 1013-1023.
77. Klok C., Chown S.L. 2003 Resistance to temperature extremes in sub - Antarctic weevils: interspecific variation, population differentiation and acclimation. *Biological Journal of the Linnean Society* **78**(3), 401-414.
78. Slabber S., Chown S.L. 2005 Differential responses of thermal tolerance to acclimation in the sub - Antarctic rove beetle *Halmaeus atriceps*. *Physiological Entomology* **30**(2), 195-204.
79. Lyons C.L., Coetzee M., Terblanche J.S., Chown S.L. 2012 Thermal limits of wild and laboratory strains of two African malaria vector species, *Anopheles arabiensis* and *Anopheles funestus*. *Malaria Journal* **11**(226), 10.1186.
80. Gray E.M. 2013 Thermal acclimation in a complex life cycle: The effects of larval and adult thermal conditions on metabolic rate and heat resistance in *Culex pipiens* (Diptera: Culicidae). *Journal of Insect Physiology* **59**(10), 1001-1007.
81. Worthen W.B., Haney D.C. 1999 Temperature tolerance in three mycophagous *Drosophila* species: relationships with community structure. *Oikos* **86**, 113-118.
82. Terblanche J.S., Klok C.J., Krafur E.S., Chown S.L. 2006 Phenotypic plasticity and geographic variation in thermal tolerance and water loss of the tsetse *Glossina pallidipes* (Diptera: Glossinidae): implications for distribution modelling. *The American Journal of Tropical Medicine and Hygiene* **74**(5), 786-794.
83. Dallas H.F., Rivers-Moore N.A. 2012 Critical thermal maxima of aquatic macroinvertebrates: towards identifying bioindicators of thermal alteration. *Hydrobiologia* **679**(1), 61-76.
84. Coccia C., Calosi P., Boyero L., Green A.J., Bilton D.T. 2013 Does ecophysiology determine invasion success? A comparison between the invasive boatman *Trichocorixa verticalis verticalis* and the native *Sigara lateralis* (Hemiptera, Corixidae) in South-West Spain. *PloS One* **8**(5), e63105.
85. Chanthy P., Martin R.J., Gunning R.V., Andrew N.R. 2012 The effects of thermal acclimation on lethal temperatures and critical thermal limits in the green vegetable bug, *Nezara viridula* (L.) (Hemiptera: Pentatomidae). *Frontiers in Physiology* **3**, doi: 10.3389/fphys.2012.00465.
86. Jumbam K.R., Jackson S., Terblanche J.S., McGeoch M.A., Chown S.L. 2008 Acclimation effects on critical and lethal thermal limits of workers of the Argentine ant, *Linepithema humile*. *Journal of Insect Physiology* **54**(6), 1008-1014.
87. Mitchell J.D., Hewitt P., Van Der Linde T.D.K. 1993 Critical thermal limits and temperature tolerance in the harvester termite *Hodotermes mossambicus* (Hagen). *Journal of Insect Physiology* **39**(6), 523-528.

88. Klok C.J., Chown S.L. 1998 Interactions between desiccation resistance, host-plant contact and the thermal biology of a leaf-dwelling sub-antarctic caterpillar, *Embryonopsis halticella* (Lepidoptera: Yponomeutidae). *Journal of Insect Physiology* **44**(7), 615-628.
89. Garten C., Gentry J. 1976 Thermal tolerance of dragonfly nymphs. II. Comparison of nymphs from control and thermally altered environments. *Physiological Zoology* **49**, 206-213.
90. Moulton S.R., Beiting T.L., Stewart K.W., Currie R.J. 1993 Upper temperature tolerance of four species of caddisflies (Insecta: Trichoptera). *Journal of Freshwater Ecology* **8**(3), 193-198.
91. Goode L.M. 2013 Effects of thermal acclimation on the critical thermal maxima of the tropical cockroaches: *Blaptica dubia*, *Eublaberus posticus* and *Blaberus discoidalis* (Blaberidae), Eastern Kentucky University.
92. Lalouette L., Williams C., Cottin M., Sinclair B.J., Renault D. 2012 Thermal biology of the alien ground beetle *Merizodus soledadinus* introduced to the Kerguelen Islands. *Polar Biology* **35**(4), 509-517.
93. Allen J.L., Clusella-Trullas S., Chown S.L. 2012 The effects of acclimation and rates of temperature change on critical thermal limits in *Tenebrio molitor* (Tenebrionidae) and *Cyrtobagous salviniae* (Curculionidae). *Journal of Insect Physiology* **58**(5), 669-678.
94. Terblanche J.S., Nyamukondiwa C., Kleynhans E. 2010 Thermal variability alters climatic stress resistance and plastic responses in a globally invasive pest, the Mediterranean fruit fly (*Ceratitidis capitata*). *Entomologia Experimentalis et Applicata* **137**(3), 304-315.
95. Piyaphongkul J., Pritchard J., Bale J. 2014 Effects of acclimation on the thermal tolerance of the brown planthopper *Nilaparvata lugens* (Stål). *Agricultural and Forest Entomology* **16**(2), 174-183.
96. Cokendolpher J.C., Phillips S.A. 1990 Critical thermal limits and locomotor activity of the red imported fire ant (Hymenoptera: Formicidae). *Environmental Entomology* **19**(4), 878-881.
97. Chidawanyika F., Terblanche J.S. 2011 Costs and benefits of thermal acclimation for codling moth, *Cydia pomonella* (Lepidoptera: Tortricidae): implications for pest control and the sterile insect release programme. *Evolutionary Applications* **4**(4), 534-544.
98. Zheng W., Hongliang L., Li M., Xiang J. 2013 Differences in thermal preference and tolerance among three *Phrynocephalus* lizards (Agamidae) with different body sizes and habitat use. *Asian Herpetological Research* **4**(3), 214-220.
99. Corn M.J. 1971 Upper thermal limits and thermal preferenda for three sympatric species of *Anolis*. *Journal of Herpetology* **5**, 17-21.

100. Yang J., Sun Y.-Y., An H., Ji X. 2008 Northern grass lizards (*Takydromus septentrionalis*) from different populations do not differ in thermal preference and thermal tolerance when acclimated under identical thermal conditions. *Journal of Comparative Physiology B* **178**(3), 343-349.
101. Li H., Wang Z., Mei W., Ji X. 2009 Temperature acclimation affects thermal preference and tolerance in three *Eremias* lizards (Lacertidae). *Current Zoology* **55**, 258-265.
102. Huang S.-P., Tu M.-C. 2008 Cold tolerance and altitudinal distribution of *Takydromus* lizards in Taiwan. *Zoological Studies* **47**(4), 438-444.
103. Scott J.R., Tracy C.R., Pettus D. 1982 A biophysical analysis of daily and seasonal utilization of climate space by a montane snake. *Ecology* **63**, 482-493.
104. Murrish D.E., Vance V.J. 1968 Physiological responses to temperature acclimation in the lizard *Uta mearnsi*. *Comparative Biochemistry and Physiology* **27**(1), 329-337.
105. Lowe C.H., Vance V.J. 1955 Acclimation of the critical thermal maximum of the reptile *Urosaurus ornatus*. *Science* **122**(3158), 73-74.
106. Huang S.-P., Hsu Y., Tu M.-C. 2006 Thermal tolerance and altitudinal distribution of two *Sphenomorphus* lizards in Taiwan. *Journal of Thermal Biology* **31**(5), 378-385.
107. Huang S.-M., Huang S.-P., Chen Y.-H., Tu M.-C. 2007 Thermal Tolerance and Altitudinal Distribution of Three *Trimeresurus* Snakes (Viperidae: Crotalinae) in Taiwan. *Zoological Studies* **46**(5), 592-599.
108. Williamson L.U., Spotila J.R., Standora E.A. 1989 Growth selected temperature and CTM of young snapping turtles, *Chelydra serpentina*. *Journal of Thermal Biology* **14**(1), 33-39.
109. Kosh R.J., Hutchison V.H. 1968 Daily rhythmicity of temperature tolerance in eastern painted turtles, *Chrysemys picta*. *Copeia*, 244-246.
110. Kour E.L., Hutchison V.H. 1970 Critical thermal tolerances and heating and cooling rates of lizards from diverse habitats. *Copeia*, 219-229.
111. Jacobson E.R., Whitford W.G. 1970 The effect of acclimation on physiological responses to temperature in the snakes, *Thamnophis proximus* and *Natrix rhombifera*. *Comparative Biochemistry and Physiology* **35**(2), 439-449.
112. Wu M.-X., Hu L.-J., Dang W., Lu H.-L., Du W.-G. 2013 Effect of thermal acclimation on thermal preference, resistance and locomotor performance of hatchling soft-shelled turtle. *Current Zoology* **59**, 718-724.
