# Supplementary material
Source: PubMed Central journal article supplement (PMC4455808)
Supplement: rspb20150401supp2.pdf [file rspb20150401supp2.pdf]

## Supplementary Tables S2-S7 and Figures S1-S5

Supplementary Table S2. Summary of preliminary models assessing effects of acclimation time and heating/cooling rates on thermal tolerance plasticity.

| model                     | $k$ | $\log(L)$ | $AIC_c$ | $\Delta_i$ | $w_i$ | $R^2$ |
|---------------------------|-----|-----------|---------|------------|-------|-------|
| a. CTmax ARR              |     |           |         |            |       |       |
| accl. time + heating rate | 10  | 244.295   | -467.7  | 0.00       | 0.589 | 0.036 |
| accl. time                | 9   | 242.625   | -466.5  | 1.18       | 0.326 | 0.019 |
| heating rate              | 9   | 241.269   | -463.8  | 3.89       | 0.084 | 0.024 |
| b. CTmin ARR              |     |           |         |            |       |       |
| accl. time                | 9   | 85.829    | -151.9  | 0.00       | 0.572 | 0.074 |
| accl. time + cooling rate | 10  | 86.458    | -150.7  | 1.15       | 0.321 | 0.094 |
| cooling rate              | 9   | 84.155    | -148.5  | 3.35       | 0.107 | 0.011 |

Supplementary Table S3. Summaries of all models for  $CT_{\max}$  ARR with latitude. If an interaction term is included, the individual terms were included as well. Marginal sum of squares (which represent variation explained by fixed effects only) are shown.

| model                                                                          | $k$ | $\log(L)$ | $AIC_c$ | $\Delta_i$ | $w_i$ | $R^2$ |
|--------------------------------------------------------------------------------|-----|-----------|---------|------------|-------|-------|
| accl. time + habitat                                                           | 11  | 255.558   | -488.1  | 0.00       | 0.428 | 0.269 |
| accl. time + habitat + hemisphere                                              | 12  | 255.598   | -486.0  | 2.11       | 0.149 | 0.260 |
| accl. time + habitat + latitude                                                | 12  | 255.559   | -485.9  | 2.19       | 0.144 | 0.269 |
| habitat                                                                        | 10  | 252.367   | -483.9  | 4.21       | 0.052 | 0.193 |
| accl. time                                                                     | 9   | 251.266   | -483.9  | 4.26       | 0.051 | 0.019 |
| accl. time + habitat + hemisphere +latitude                                    | 13  | 255.599   | -483.8  | 4.31       | 0.050 | 0.259 |
| accl. time + habitat x latitude + habitat x hemisphere                         | 17  | 259.664   | -482.9  | 5.17       | 0.032 | 0.233 |
| accl. time + habitat x hemisphere x latitude                                   | 20  | 262.919   | -482.5  | 5.58       | 0.026 | 0.281 |
| accl. time + hemisphere                                                        | 10  | 251.315   | -481.8  | 6.32       | 0.018 | 0.018 |
| accl. time + latitude                                                          | 10  | 251.267   | -481.7  | 6.41       | 0.017 | 0.018 |
| accl. time + habitat x latitude + hemisphere x latitude                        | 16  | 257.869   | -481.6  | 6.48       | 0.017 | 0.210 |
| accl. time + habitat x latitude + hemisphere x latitude + habitat x hemisphere | 18  | 259.865   | -481.1  | 7.05       | 0.013 | 0.217 |
| latitude                                                                       | 9   | 248.290   | -477.9  | 10.21      | 0.003 | 0.000 |

Supplementary Table S4. Summaries of all models for  $CT_{\min}$  ARR with latitude.

| model                                        | $k$ | $\log(L)$ | $AIC_c$ | $\Delta_i$ | $w_i$ | $R^2$ |
|----------------------------------------------|-----|-----------|---------|------------|-------|-------|
| accl. time + habitat                         | 11  | 94.303    | -163.9  | 0.00       | 0.300 | 0.288 |
| habitat                                      | 10  | 92.944    | -163.8  | 0.15       | 0.278 | 0.267 |
| accl. time + habitat + hemisphere            | 12  | 94.635    | -162.1  | 1.85       | 0.119 | 0.314 |
| accl. time + habitat x latitude              | 14  | 97.162    | -161.9  | 1.99       | 0.111 | 0.352 |
| accl. Time                                   | 9   | 90.087    | -160.4  | 3.55       | 0.051 | 0.074 |
| accl. time + hemisphere + habitat + latitude | 13  | 95.019    | -160.3  | 3.65       | 0.048 | 0.336 |
| accl. time + hemisphere + habitat x latitude | 15  | 97.561    | -160.1  | 3.87       | 0.043 | 0.377 |
| accl. time + latitude                        | 10  | 90.583    | -159.0  | 4.97       | 0.025 | 0.108 |
| hemisphere + habitat x latitude              | 14  | 95.155    | -157.9  | 6.01       | 0.015 | 0.348 |
| latitude                                     | 9   | 88.527    | -157.3  | 6.67       | 0.011 | 0.021 |

Supplementary Table S5. Summaries of all models for *CT* ARR with seasonality

| model                              | <i>k</i> | log( <i>L</i> ) | AIC <sub>c</sub> | $\Delta_i$ | <i>w<sub>i</sub></i> | <i>R</i> <sup>2</sup> |
|------------------------------------|----------|-----------------|------------------|------------|----------------------|-----------------------|
| a. seasonality and CTmax ARR       |          |                 |                  |            |                      |                       |
| accl. time + habitat               | 11       | 217.449         | -411.7           | 0.00       | 0.487                | 0.216                 |
| accl. time                         | 9        | 214.201         | -409.6           | 2.10       | 0.171                | 0.023                 |
| accl. time + habitat + seasonality | 12       | 217.450         | -409.4           | 2.23       | 0.160                | 0.216                 |
| accl. time + habitat x seasonality | 14       | 218.973         | -408.0           | 3.71       | 0.076                | 0.224                 |
| accl. time + seasonality           | 10       | 214.208         | -407.4           | 4.27       | 0.058                | 0.024                 |
| habitat                            | 10       | 213.936         | -406.8           | 4.82       | 0.044                | 0.166                 |
| seasonality                        | 9        | 210.635         | -402.4           | 9.23       | 0.005                | 0.000                 |
| b. seasonality and CTmin ARR       |          |                 |                  |            |                      |                       |
| seasonality                        | 9        | 72.000          | -122.4           | 0.00       | 0.731                | 0.408                 |
| accl. time + seasonality           | 10       | 72.189          | -119.9           | 2.51       | 0.208                | 0.403                 |
| acclimation time                   | 9        | 69.517          | -117.4           | 4.96       | 0.061                | 0.306                 |

Supplementary Table S6. Summary of models including trade-offs between *CT* ARR and inherent thermal tolerance.

| model                          | <i>k</i> | log( <i>L</i> ) | AIC <sub>c</sub> | $\Delta_i$ | <i>w<sub>i</sub></i> | <i>R</i> <sup>2</sup> |
|--------------------------------|----------|-----------------|------------------|------------|----------------------|-----------------------|
| a. CTmax ARR and maximum CTmax |          |                 |                  |            |                      |                       |
| accl. time                     | 9        | 251.266         | -483.9           | 0.00       | 0.713                | 0.019                 |
| accl. time + max CT            | 10       | 251.304         | -481.8           | 2.08       | 0.252                | 0.020                 |
| max CT                         | 9        | 248.246         | -477.8           | 6.04       | 0.035                | 0.000                 |
| b. CTmin ARR and minimum CTmin |          |                 |                  |            |                      |                       |
| accl. Time                     | 10       | 90.870          | -159.5           | 0.00       | 0.693                | 0.074                 |
| accl. time + min CT            | 11       | 90.871          | -157.1           | 2.47       | 0.202                | 0.074                 |
| min CT                         | 9        | 87.779          | -155.8           | 3.77       | 0.105                | 0.003                 |

Supplementary Table S7. Summary of models examining the relationship between  $CT_{\max}$  ARR and  $CT_{\min}$  ARR.

| model                 | $k$ | $\log(L)$ | $AIC_c$ | $\Delta_i$ | $w_i$ | $R^2$ |
|-----------------------|-----|-----------|---------|------------|-------|-------|
| accl time + CTmin ARR | 10  | 109.175   | -196.0  | 0.00       | 0.785 | 0.211 |
| CTmin ARR             | 9   | 106.430   | -192.9  | 3.04       | 0.172 | 0.090 |
| accl time             | 9   | 105.056   | -190.2  | 5.79       | 0.043 | 0.076 |

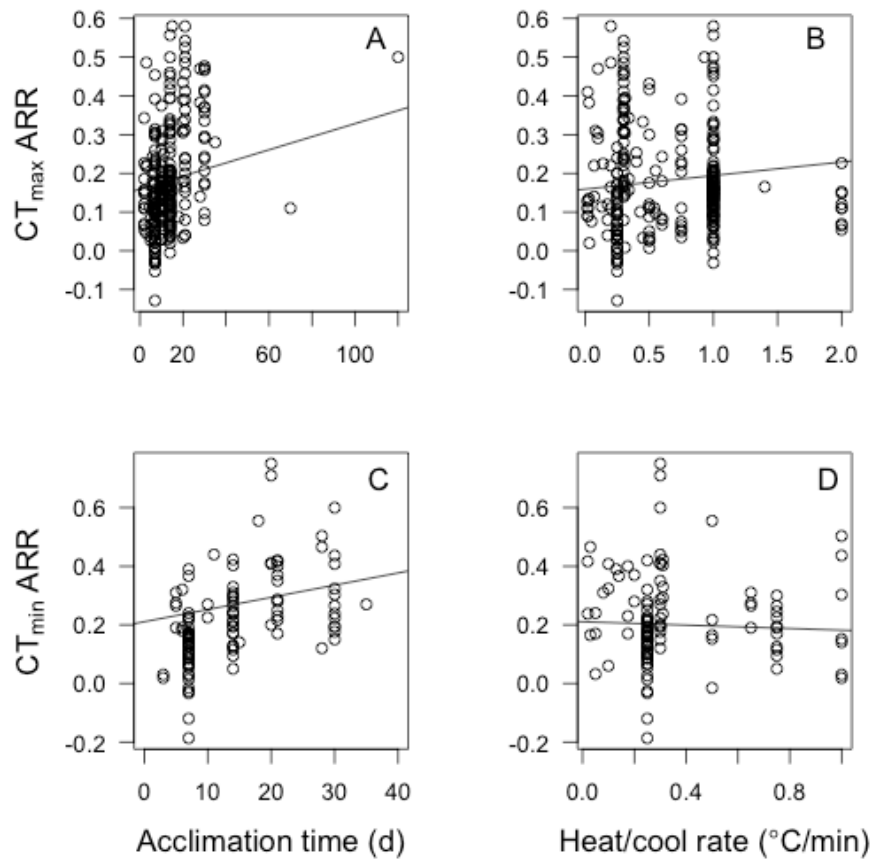

Supplementary Figure S1.  $CT_{\max}$  ARR and  $CT_{\min}$  ARR in relation to acclimation time (A,C) and B) heating rate ( $CT_{\max}$  ARR) or D) cooling rate ( $CT_{\min}$  ARR). Model-averaged slopes are shown.

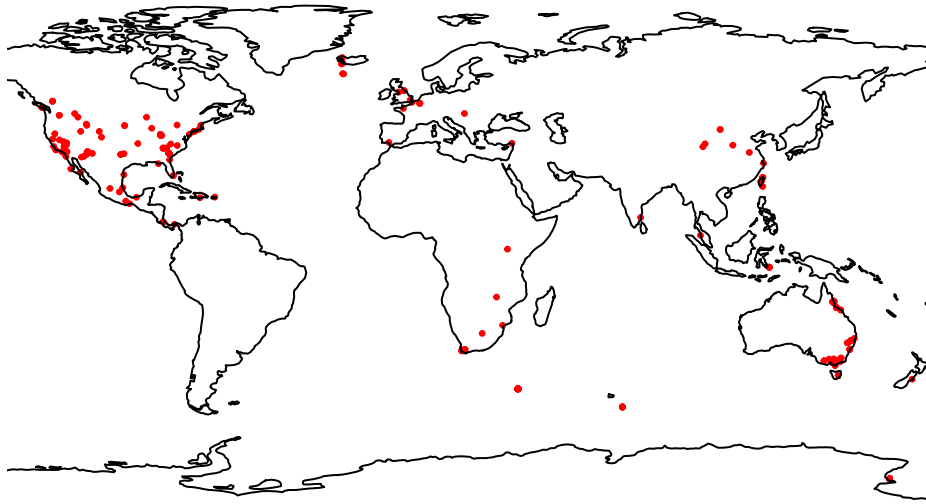

Supplementary Figure S2. Collection localities for taxa used to assess the relationship between plasticity and thermal seasonality.

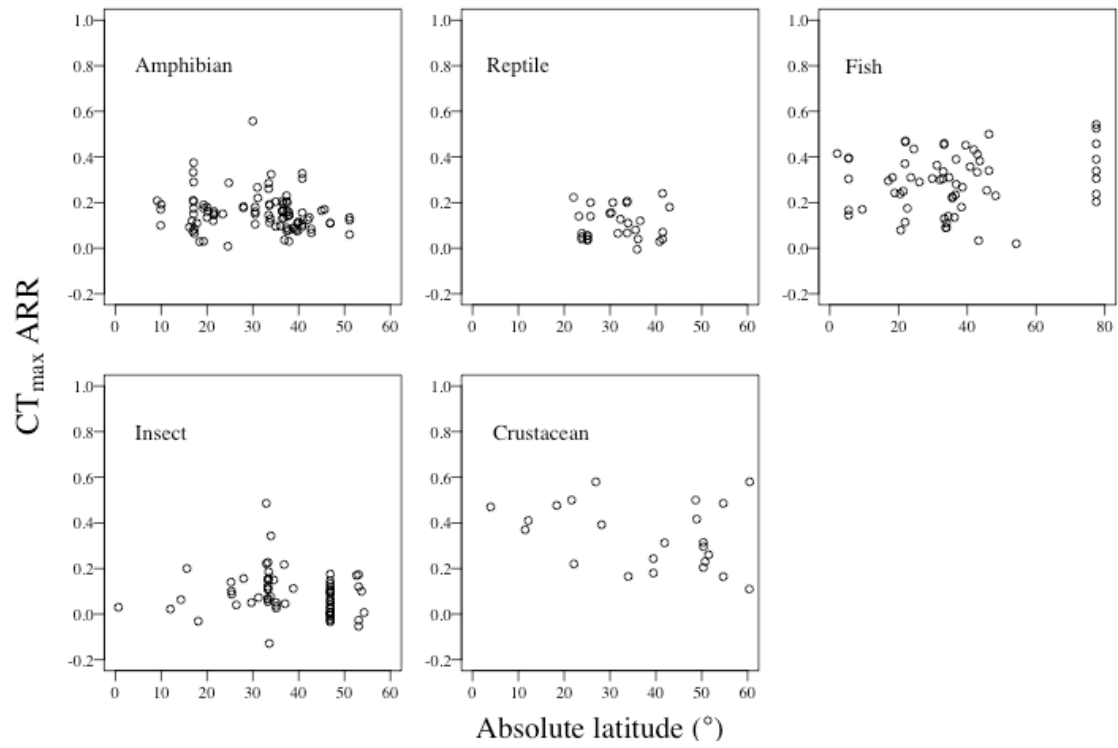

Supplementary Figure S3.  $CT_{max}$  ARR with respect to latitude for each major clade.

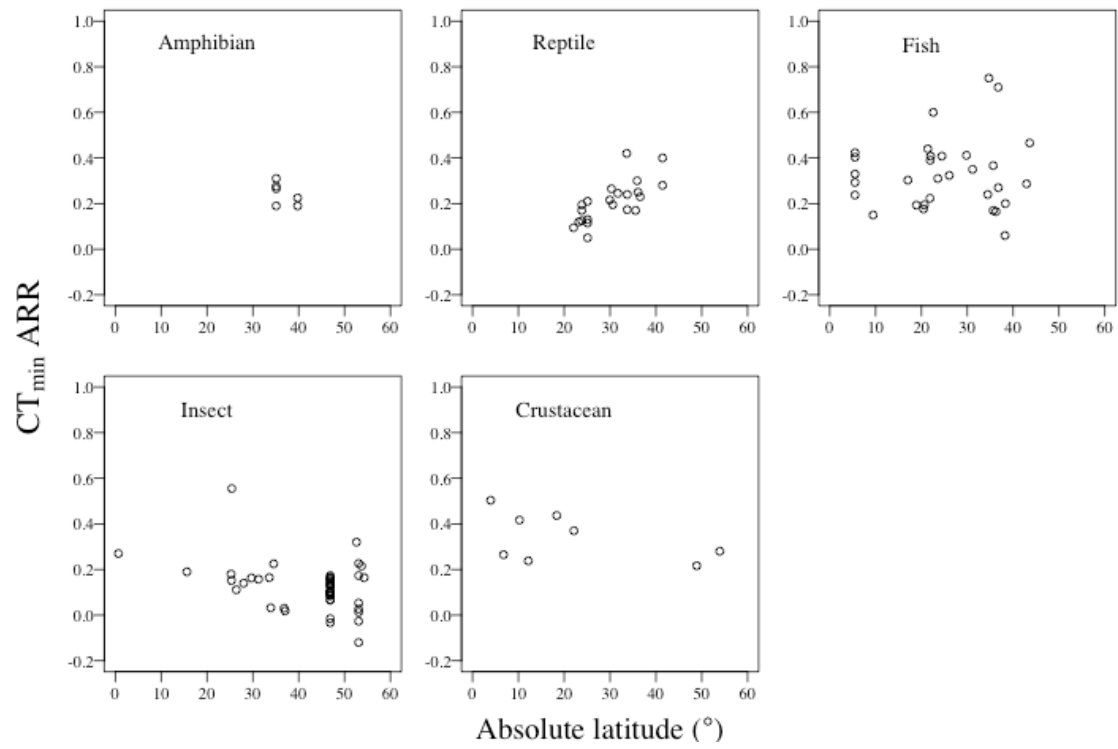

Supplementary Figure S4.  $CT_{\min} ARR$  with respect to latitude for each major clade.



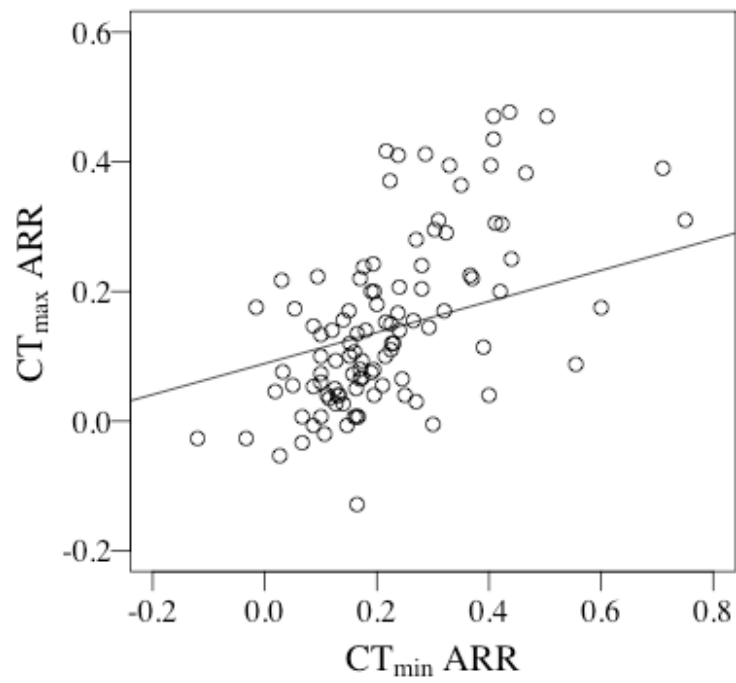

Supplementary Figure S5. Relationship between plasticity in upper and lower thermal tolerance.

Model-averaged slope is shown.
